# Supplementary material for: Differentiating Nanomaghemite and Nanomagnetite and Discussing Their Importance in Arsenic and Lead Removal from Contaminated Effluents: A Critical Review
Source: MDPI journal article supplement (doi:10.3390/nano11092310), 2021-09-06
Supplement: s1 [file s1]

## Supplementary Materials for

# Differentiating Nanomaghemite and Nanomagnetite and Discussing Their Importance in Arsenic and Lead Removal from Contaminated Effluents: A Critical Review

Juan A. Ramos-Guivar <sup>1,\*</sup>, Diego A. Flores-Cano <sup>1</sup> and Edson Caetano Passamani <sup>2</sup>

<sup>1</sup> Grupo de Investigación de Nanotecnología Aplicada para Biorremediación Ambiental, Biomedicina y Agricultura (NANOTECH), Facultad de Ciencias Físicas, Universidad Nacional Mayor de San Marcos, Lima 15081, Venezuela; Perú; diego.flores4@unmsm.edu.pe

<sup>2</sup> Physics Department, Federal University of Espírito Santo, Vitória, ES 29075-910, Brazil; passamaniec@yahoo.com.br

\* Correspondence: juan.ramos5@unmsm.edu.pe; Tel.: +51-1-914728212

### List of acronyms

TABLE S1

|                                                                |                                                                                                                                                                                                |
|----------------------------------------------------------------|------------------------------------------------------------------------------------------------------------------------------------------------------------------------------------------------|
| $\gamma$ -Fe <sub>2</sub> O <sub>3</sub> @starch               | : starch functionalized nano- $\gamma$ -Fe <sub>2</sub> O <sub>3</sub> .                                                                                                                       |
| MBC                                                            | : magnetized biochar (vegetal carbon) composite.                                                                                                                                               |
| MtZ                                                            | : nano-Fe <sub>3</sub> O <sub>4</sub> -zeolite composite.                                                                                                                                      |
| CMnano                                                         | : nano- $\gamma$ -Fe <sub>2</sub> O <sub>3</sub> plus concrete.                                                                                                                                |
| PVA – SPIONs                                                   | : polyvinyl alcohol-Superparamagnetic iron-oxide NPs (nano-Fe <sub>3</sub> O <sub>4</sub> with possible oxidation towards nano- $\gamma$ -Fe <sub>2</sub> O <sub>3</sub> , stabilized by PVA). |
| bilayer-OA@FeO NPs                                             | : bilayer-oleic coated iron-oxide NPs ( $\gamma$ -Fe <sub>2</sub> O <sub>3</sub> and Fe <sub>3</sub> O <sub>4</sub> ).                                                                         |
| FeOx-GO-80                                                     | : amorphous iron-oxide-graphene oxide-80 wt% of amorphous iron-oxide.                                                                                                                          |
| iMNP                                                           | : magnetic NPs from iron-containing sludge. It mainly contained $\gamma$ -Fe <sub>2</sub> O <sub>3</sub> .                                                                                     |
| GM                                                             | : graphene oxide supported Fe <sub>3</sub> O <sub>4</sub> .                                                                                                                                    |
| $\gamma$ -Fe <sub>2</sub> O <sub>3</sub> @CTF-1                | : $\gamma$ -Fe <sub>2</sub> O <sub>3</sub> /covalent triazine framework.                                                                                                                       |
| Fe <sub>2</sub> O <sub>3</sub> -ZrO <sub>2</sub> /BC           | : Fe <sub>2</sub> O <sub>3</sub> -zirconium oxide/black cumin.                                                                                                                                 |
| BCA-Fe                                                         | : activated biochar covered with nano-Fe <sub>3</sub> O <sub>4</sub> .                                                                                                                         |
| HFe10k                                                         | : halloysite containing sample with iron-oxide particles in a 10% proportion and calcined.                                                                                                     |
| BC-Fe                                                          | : bamboo Fe biochar, it contains Fe <sub>3</sub> O <sub>4</sub> .                                                                                                                              |
| $\gamma$ -Fe <sub>2</sub> O <sub>3</sub> -TiO <sub>2</sub> -GO | : $\gamma$ -Fe <sub>2</sub> O <sub>3</sub> -titanium dioxide- graphene oxide.                                                                                                                  |
| MBP                                                            | : bio-based substances-stabilized Fe <sub>3</sub> O <sub>4</sub> / $\gamma$ -Fe <sub>2</sub> O <sub>3</sub> after pyrolysis.                                                                   |
| Fe <sub>3</sub> O <sub>4</sub> :S                              | : Sulfur doped nano-Fe <sub>3</sub> O <sub>4</sub> .                                                                                                                                           |
| c-MNPs                                                         | : coated magnetic NPs (FeOOH coated $\gamma$ -Fe <sub>2</sub> O <sub>3</sub> ).                                                                                                                |
| Fe <sub>3</sub> O <sub>4</sub> @CuO&GO                         | : Fe <sub>3</sub> O <sub>4</sub> /copper oxide and graphene oxide.                                                                                                                             |
| BMN nanocomposites                                             | : biomass-derived magnetic nanocomposite ( $\gamma$ -Fe <sub>2</sub> O <sub>3</sub> , $\alpha$ -Fe <sub>2</sub> O <sub>3</sub> and zero valent iron).                                          |
| 20%FBC                                                         | : iron-impregnated biochar with 20% Fe to biomass ratio, it contains $\gamma$ -Fe <sub>2</sub> O <sub>3</sub> and $\alpha$ -Fe <sub>2</sub> O <sub>3</sub> .                                   |

TABLE S2

|                                                  |                                                                                                                                      |
|--------------------------------------------------|--------------------------------------------------------------------------------------------------------------------------------------|
| HA                                               | : humic acid.                                                                                                                        |
| GO/Fe <sub>3</sub> O <sub>4</sub> /HA            | : graphene/Fe <sub>3</sub> O <sub>4</sub> /humic acid.                                                                               |
| HA-Fe <sub>3</sub> O <sub>4</sub>                | : humic acid grafted Fe <sub>3</sub> O <sub>4</sub> .                                                                                |
| NC-MA/L-Fe <sub>3</sub> O <sub>4</sub>           | : nanocellulose-maleic anhydride/(ethylenediamine-ethylenediaminetetraacetic acid-ethylenediamine)- Fe <sub>3</sub> O <sub>4</sub> . |
| Fe <sub>3</sub> O <sub>4</sub> /NOG              | : Fe <sub>3</sub> O <sub>4</sub> /non-oxidative graphene.                                                                            |
| Fe <sub>3</sub> O <sub>4</sub> @sand             | : Fe <sub>3</sub> O <sub>4</sub> coated sand.                                                                                        |
| PAN/GO/ $\gamma$ -Fe <sub>3</sub> O <sub>4</sub> | : polyacrylonitrile/graphene oxide/ $\gamma$ -Fe <sub>2</sub> O <sub>3</sub> .                                                       |

TABLE S3

|                                                             |                                                                                                     |
|-------------------------------------------------------------|-----------------------------------------------------------------------------------------------------|
| $\gamma$ – Fe <sub>2</sub> O <sub>3</sub> @SiO <sub>2</sub> | : $\gamma$ -Fe <sub>2</sub> O <sub>3</sub> NPs functionalized with silica.                          |
| $\gamma$ – Fe <sub>2</sub> O <sub>3</sub> – SBA15           | : $\gamma$ -Fe <sub>2</sub> O <sub>3</sub> NPs functionalized with mesoporous silica.               |
| $\gamma$ – Fe <sub>2</sub> O <sub>3</sub> @OA               | : $\gamma$ -Fe <sub>2</sub> O <sub>3</sub> NPs functionalized with oleic acid.                      |
| $\gamma$ – Fe <sub>2</sub> O <sub>3</sub> @LA               | : $\gamma$ -Fe <sub>2</sub> O <sub>3</sub> NPs functionalized with lauric acid.                     |
| $\gamma$ – Fe <sub>2</sub> O <sub>3</sub> @L-arg            | : $\gamma$ -Fe <sub>2</sub> O <sub>3</sub> NPs functionalized with L-arginine.                      |
| $\gamma$ – Fe <sub>2</sub> O <sub>3</sub> @Hap              | : $\gamma$ -Fe <sub>2</sub> O <sub>3</sub> NPs functionalized with hydroxyapatite.                  |
| $\gamma$ – Fe <sub>2</sub> O <sub>3</sub> @MWCNTs           | : $\gamma$ -Fe <sub>2</sub> O <sub>3</sub> NPs functionalized with carbon nanotubes.                |
| $\gamma$ – Fe <sub>2</sub> O <sub>3</sub> – EDTA1           | : $\gamma$ -Fe <sub>2</sub> O <sub>3</sub> NPs functionalized with ethylenediaminetetraacetic acid. |

$\gamma$ -Fe<sub>2</sub>O<sub>3</sub>-EDTA2 :  $\gamma$ -Fe<sub>2</sub>O<sub>3</sub> NPs functionalized with ethylenediaminetetraacetic acid.  
 $\gamma$ -Fe<sub>2</sub>O<sub>3</sub>-EDTA3 :  $\gamma$ -Fe<sub>2</sub>O<sub>3</sub> NPs functionalized with ethylenediaminetetraacetic acid.  
L-Cyst-Fe<sub>3</sub>O<sub>4</sub> : L-cysteine functionalized Fe<sub>3</sub>O<sub>4</sub> NPs.  
Fe<sub>3</sub>O<sub>4</sub>-NH<sub>2</sub> : amine functionalized Fe<sub>3</sub>O<sub>4</sub> NPs.  
Fe<sub>3</sub>O<sub>4</sub>@PDA : Fe<sub>3</sub>O<sub>4</sub> NPs functionalized with polydopamine.  
Fe<sub>3</sub>O<sub>4</sub>-ETT : Fe<sub>3</sub>O<sub>4</sub>-epoxy-triazinetriene (ETT).  
Fe<sub>3</sub>O<sub>4</sub>-PEI/ $\beta$ -CD : Fe<sub>3</sub>O<sub>4</sub>-polyethyleneimine/ $\beta$ -cyclodextrin.  
Fe<sub>3</sub>O<sub>4</sub>@SiO<sub>2</sub>@PEI-NTDA : Fe<sub>3</sub>O<sub>4</sub>/Silicon dioxide/polyethylenimine-1,4,5,8-naphthalenetetracarboxylic-dianhydride.  
Fe<sub>3</sub>O<sub>4</sub>-g-C<sub>3</sub>N<sub>4</sub> : Fe<sub>3</sub>O<sub>4</sub>-graphitic carbon nitride.  
Fe<sub>3</sub>O<sub>4</sub>-SO<sub>3</sub>H : sulfonated magnetic NP adsorbents.  
Fe<sub>3</sub>O<sub>4</sub>@APS : 3-aminopropyltriethoxysilane functionalized magnetic NPs.  
Fe<sub>3</sub>O<sub>4</sub>@APS@AA-co-CA : 3-aminopropyltriethoxysilane - acrylic acid and crotonic acid copolymer functionalized magnetic NPs. CNTs/ Fe<sub>3</sub>O<sub>4</sub>  
: thiol-functionalized multiwall carbon nanotube/ Fe<sub>3</sub>O<sub>4</sub> nanocomposites.  
MPTS-CNTs/ Fe<sub>3</sub>O<sub>4</sub> : 3-mercaptopropyltriethoxysilane (MPTS)-the as-synthesized thiol-functionalized CNTs/ Fe<sub>3</sub>O<sub>4</sub>.  
Fe<sub>3</sub>O<sub>4</sub>@C/TiO<sub>2</sub> :  $\gamma$ -Fe<sub>2</sub>O<sub>3</sub>/carbon particles/titanium dioxide.  
Fe<sub>3</sub>O<sub>4</sub>-FeMoS<sub>4</sub>-MgAl-LDH : Fe<sub>3</sub>O<sub>4</sub>-FeMoS<sub>4</sub><sup>2-</sup> magnesium-aluminum layered double hydroxide.  
SH-mSi@ Fe<sub>3</sub>O<sub>4</sub> : thiol-functionalized magnetic mesoporous silica material.  
mHAP-oMWCNTs : magnetic hydroxyapatite-immobilized oxidized multi-walled carbon nanotubes.  
GFMNPECABs : glycine-functionalized magnetic NPs-entrapped calcium alginate beads.  
GFMNPS: Glycine functionalized magnetic NPs.  
RT: room temperature.  
p.z.c. point of zero charge.  
q<sub>e</sub> or q<sub>m</sub>: Langmuir's maximum adsorption capacity (mg g<sup>-1</sup>).  
k<sub>F</sub>: Freundlich adsorption constant (L mg<sup>-1</sup>).  
k<sub>s</sub>: Sips constant (L mg<sup>-1</sup>)<sup>m</sup>.  
K<sub>T</sub>: equilibrium binding constant (L mg<sup>-1</sup>).  
k<sub>L</sub>: Langmuir adsorption constant (L mg<sup>-1</sup>).  
q<sub>mDR</sub>: Dubinin-Radushkevich's maximum adsorption capacity.  
DLS: Dynamic light scattering.  
AFM: Atomic Force Microscopy.  
SEM: Scanning Electron Microscopy.  
SAXS: Small-angle X-ray scattering.  
EDS: Electron Dispersive X-ray Spectroscopy.  
FESEM: Field Emission Scanning Electron Microscope.  
BET: Brunauer-Emmett-Teller.

**Table S1.** Structure and adsorption parameters of magnetic nanohybrids used for As(III) and As(V) adsorption.

| Adsorbent                                        | Synthesis method                   | Size and shape                                                                                     | Surface area                         | Saturation magnetization (RT) | Adsorbates | Initial concentration (C <sub>0</sub> ) and equilibrium time (t <sub>e</sub> ) | Concentration range in isotherm experiments | Adsorption conditions                          | Kinetic and isothermal parameters                                                                                                                                                                                                                                                                                                                                                                                                                                      | Ref. |
|--------------------------------------------------|------------------------------------|----------------------------------------------------------------------------------------------------|--------------------------------------|-------------------------------|------------|--------------------------------------------------------------------------------|---------------------------------------------|------------------------------------------------|------------------------------------------------------------------------------------------------------------------------------------------------------------------------------------------------------------------------------------------------------------------------------------------------------------------------------------------------------------------------------------------------------------------------------------------------------------------------|------|
| $\gamma$ -Fe <sub>2</sub> O <sub>3</sub> @starch | Coprecipitation                    | TEM: 9.7 nm<br>XRD: 8.1 nm<br>spherical NPs                                                        | -                                    | -                             | As(III)    | C <sub>0</sub> =1 mg L <sup>-1</sup>                                           | 1.0-6.0 mg L <sup>-1</sup>                  | T=27 °C<br>pH=7<br>dose=1 g L <sup>-1</sup>    | <b>Pseudo-second order:</b><br>q <sub>e</sub> =1.02 mg g <sup>-1</sup><br>k <sub>2</sub> =11.55 g mg <sup>-1</sup> min <sup>-1</sup><br>R <sup>2</sup> =0.98<br><b>Langmuir:</b><br>q <sub>m</sub> =8.6 mg g <sup>-1</sup><br>k <sub>L</sub> =9.1 L mg <sup>-1</sup><br>R <sup>2</sup> =0.98<br><b>Freundlich:</b><br>k <sub>F</sub> =16.5 mg g <sup>-1</sup> (L mg <sup>-1</sup> ) <sup>1/n</sup><br>n=1.60<br>R <sup>2</sup> =0.98<br><b>Removal:</b><br>99 %        | [58] |
| MBC                                              | Coprecipitation                    | STEM: 18.1 nm<br>(Fe <sub>3</sub> O <sub>4</sub> ) clustered or aggregated on the surface (2-7 μm) | 320.1 m <sup>2</sup> g <sup>-1</sup> | -                             | As(III)    | C <sub>0</sub> =10 mg L <sup>-1</sup><br>t <sub>e</sub> =1 - 1.5 h             | 1-12 mg L <sup>-1</sup>                     | T=25 °C<br>pH=7<br>dose=2 g L <sup>-1</sup>    | <b>Pseudo-second order:</b><br>q <sub>e</sub> =3.75 mg g <sup>-1</sup><br>k <sub>2</sub> =0.319 g mg <sup>-1</sup> min <sup>-1</sup><br>R <sup>2</sup> =0.9999<br><b>Sips:</b><br>q <sub>s</sub> =5.49 mg g <sup>-1</sup><br>k <sub>s</sub> =1.14 L mg <sup>-1</sup><br>R <sup>2</sup> =0.9889<br><b>Langmuir:</b><br>q <sub>m</sub> =5.06 mg g <sup>-1</sup><br>k <sub>L</sub> =0.96 - 0.22 L mg <sup>-1</sup><br>R <sup>2</sup> <0.9889<br><b>Removal:</b><br>68.4 % | [59] |
| MtZ                                              | Alkaline precipitation and coating | SEM: 77 nm Fe <sub>3</sub> O <sub>4</sub>                                                          | 38 m <sup>2</sup> g <sup>-1</sup>    | -                             | As(V)      | C <sub>0</sub> =100 mg L <sup>-1</sup><br>t <sub>e</sub> =3 h                  | 1-450 mg L <sup>-1</sup>                    | T=25 °C<br>pH=5.5<br>dose=10 g L <sup>-1</sup> | <b>Pseudo-second order:</b><br>q <sub>e</sub> =1.35 mg g <sup>-1</sup><br>k <sub>2</sub> =0.109 g mg <sup>-1</sup> min <sup>-1</sup><br>R <sup>2</sup> =0.904<br><b>Langmuir:</b><br>q <sub>m</sub> =6.211 mg g <sup>-1</sup><br>k <sub>L</sub> =0.009 L mg <sup>-1</sup><br>R <sup>2</sup> =0.995<br><b>Freundlich:</b>                                                                                                                                               | [60] |

|                         |                 |                                                                                                                            |                                     |                          |         |                                                           |                               |                                                |      |                                                                                                                                                                                                                                                                                                                      |
|-------------------------|-----------------|----------------------------------------------------------------------------------------------------------------------------|-------------------------------------|--------------------------|---------|-----------------------------------------------------------|-------------------------------|------------------------------------------------|------|----------------------------------------------------------------------------------------------------------------------------------------------------------------------------------------------------------------------------------------------------------------------------------------------------------------------|
|                         |                 |                                                                                                                            |                                     |                          |         |                                                           |                               |                                                |      | $k_F=0.209 \text{ mg g}^{-1}$<br>$n=1.877$<br>$R^2=0.957$                                                                                                                                                                                                                                                            |
|                         |                 |                                                                                                                            |                                     |                          |         |                                                           |                               |                                                |      | <b>Pseudo-second order:</b><br>$q_e=0.618 \text{ mg g}^{-1}$<br>$k_2=0.436 \text{ g mg}^{-1} \text{ h}^{-1}$<br>$R^2=0.991$<br><b>Langmuir:</b><br>$q_m=11.12 \text{ mg g}^{-1}$<br>$R^2=0.995$<br><b>Gunary:</b><br>$q_m=8.82 \text{ mg g}^{-1}$<br>$R^2=0.998$<br><b>Removal:</b><br>85 %                          |
| CMnano                  | Coprecipitation | SEM: ~20 nm<br>XRD: 17 nm round shaped                                                                                     | -                                   | 3.45 emu $\text{g}^{-1}$ | As(V)   | $C_0=12.5 \text{ mg L}^{-1}$<br>$t_e=72 \text{ h}$        | 0.1-1300 mg $\text{L}^{-1}$   | T=30 °C<br>pH=5<br>dose=20 g $\text{L}^{-1}$   | [61] |                                                                                                                                                                                                                                                                                                                      |
| PVA - SPIONs            | Coprecipitation | TEM: 9 nm (SPIONs),<br>SEM:9.5 nm (SPIONs),<br>XRD: 10 nm (SPIONs),<br>a=8.367 Å (SPIONs)<br>a=8.38 Å (SPIONs in membrane) | -                                   | 74 emu $\text{g}^{-1}$   | As(V)   | $C_0=0.86 \text{ mg L}^{-1}$<br>$t_e=6 \text{ h}$         | 0.15-1.1 mg $\text{L}^{-1}$   | T=25 °C<br>pH=3<br>dose=8.4 mg $\text{L}^{-1}$ | [44] | <b>Langmuir:</b><br>$q_m=52 \text{ mg g}^{-1}$<br>$k_L=0.496 \text{ L mg}^{-1}$<br>$R^2=0.991$<br><b>Freundlich:</b><br>$k_F=0.03 \text{ mg g}^{-1}$<br>$n=0.94$<br>$R^2=0.985$                                                                                                                                      |
|                         |                 |                                                                                                                            |                                     |                          |         |                                                           |                               |                                                |      | <b>Pseudo-second order:</b><br>$q_e=11.9 \text{ } \mu\text{g g}^{-1}$<br>$k_2=2 \text{ g mg}^{-1} \text{ min}^{-1}$<br>$R^2=0.968$<br><b>Langmuir:</b><br>$q_m=0.0328 \text{ mg g}^{-1}$<br>$k_L=0.72 \text{ L g}^{-1}$<br>$R^2=0.93$<br><b>Freundlich:</b><br>$k_F=1.8 \text{ L mg}^{-1}$<br>$n=1.82$<br>$R^2=0.99$ |
| bilayer-OA@FeO NPs      | Coprecipitation | SEM: 20-40 nm                                                                                                              | 6.53 m <sup>2</sup> $\text{g}^{-1}$ | -                        | As(V)   | $C_0=0.03 \text{ mg L}^{-1}$<br>$t_e=2 \text{ h}$         | 0.001-0.15 mg $\text{L}^{-1}$ | T=25 °C<br>pH=7<br>dose=1 g $\text{L}^{-1}$    | [63] |                                                                                                                                                                                                                                                                                                                      |
|                         |                 |                                                                                                                            |                                     |                          |         |                                                           |                               |                                                |      | <b>Pseudo-second order:</b><br>$q_e=110 \text{ mg g}^{-1}$<br>$k_2=0.001 \text{ g mg}^{-1} \text{ min}^{-1}$<br>$R^2=1.000$<br><b>Langmuir:</b><br>$q_m=147 \text{ mg g}^{-1}$<br>$k_L=0.011 \text{ L mg}^{-1}$<br>$R^2=0.991$<br><b>Removal:</b>                                                                    |
| FeO <sub>x</sub> -GO-80 | Coprecipitation | TEM: 5 nm amorphous                                                                                                        | 341 m <sup>2</sup> $\text{g}^{-1}$  | -                        | As(III) | $C_0=400 \text{ mg L}^{-1}$<br>$t_e \sim 250 \text{ min}$ | 25-1200 mg $\text{L}^{-1}$    | T=23 °C<br>pH=7<br>dose=0.8 g $\text{L}^{-1}$  | [64] |                                                                                                                                                                                                                                                                                                                      |

| Adsorbent                                   | Preparation     | Characterization                                                                                | Surface area                       | Adsorption capacity       | Contaminant | Initial concentration                                           | Equilibrium concentration          | Conditions                                                                    | Adsorption isotherm                                                                                                                                                                                                                                                                                                                                       | Removal efficiency | Reference |
|---------------------------------------------|-----------------|-------------------------------------------------------------------------------------------------|------------------------------------|---------------------------|-------------|-----------------------------------------------------------------|------------------------------------|-------------------------------------------------------------------------------|-----------------------------------------------------------------------------------------------------------------------------------------------------------------------------------------------------------------------------------------------------------------------------------------------------------------------------------------------------------|--------------------|-----------|
|                                             |                 |                                                                                                 |                                    |                           | As(V)       | $C_0=300 \text{ mg L}^{-1}$<br>$t_e \sim 1450 \text{ min}$      | $25\text{--}350 \text{ mg L}^{-1}$ | $T=23^\circ\text{C}$<br>$\text{pH}=3$<br>$\text{dose}=0.8 \text{ g L}^{-1}$   | <b>Pseudo-second order:</b><br>$q_e=114 \text{ mg g}^{-1}$<br>$k_2=0.001 \text{ g mg}^{-1} \text{ min}^{-1}$<br>$R^2=1$<br><b>Langmuir:</b><br>$q_m=113 \text{ mg g}^{-1}$<br>$k_L=0.295 \text{ L mg}^{-1}$<br>$R^2=0.994$<br><b>Removal:</b><br>$>99.98 \%$                                                                                              |                    | [65]      |
| iMNP                                        | Coprecipitation | TEM: 14.3–45.1 nm (avg.=23.5 nm) quasi-spherical                                                | $145.5 \text{ m}^2 \text{ g}^{-1}$ | $35.5 \text{ emu g}^{-1}$ | As(V)       | $C_0=400 \mu\text{g L}^{-1}$<br>$t_e=60 \text{ min}$            | $1\text{--}10 \text{ mg L}^{-1}$   | $T=25^\circ\text{C}$<br>$\text{pH}=6.6$<br>$\text{dose}=0.2 \text{ g L}^{-1}$ | <b>Pseudo-second order:</b><br>$q_e=1.879 \text{ mg g}^{-1}$<br>$k_2=0.4753 \text{ g mg}^{-1} \text{ min}^{-1}$<br>$R^2=0.9996$<br><b>Langmuir:</b><br>$q_m=12.74 \text{ mg g}^{-1}$<br>$k_L=6.025 \text{ L mg}^{-1}$<br>$R^2=0.8976$<br><b>Freundlich:</b><br>$k_F=10.50 \text{ L g}^{-1}$<br>$1/n=0.100$<br>$R^2=0.7236$<br><b>Removal:</b><br>$>90 \%$ |                    | [65]      |
| GM                                          | Coprecipitation | TEM: 5.5–12.5 nm spherical, agglomerated and deposited on an irregular shaped and paper-like GO | -                                  | -                         | As(III)     | $C_0=5 \text{ mg L}^{-1}$                                       | -                                  | $T=22^\circ\text{C}$<br>$\text{pH}=9$<br>$\text{dose}=333 \text{ mg L}^{-1}$  | <b>Pseudo-second order:</b><br>$q_e=2.554 \text{ mg g}^{-1}$<br>$k_2=-2.688 \text{ mg min g}^{-1}$<br>$R^2=0.9999$<br><b>Langmuir:</b><br>$q_m=198.0 \text{ mg g}^{-1}$<br><b>Removal:</b><br>Maximum removal efficiency=97.1 %                                                                                                                           |                    | [66]      |
|                                             |                 |                                                                                                 |                                    |                           | As(V)       | $C_0=5 \text{ mg L}^{-1}$                                       | -                                  | $T=22^\circ\text{C}$<br>$\text{pH}=3$<br>$\text{dose}=333 \text{ mg L}^{-1}$  | <b>Pseudo-second order:</b><br>$q_e=1.859 \text{ mg g}^{-1}$<br>$k_2^{-1}=-3.709 \text{ mg min g}^{-1}$<br>$R^2=0.9999$                                                                                                                                                                                                                                   |                    | [67]      |
| $\gamma\text{-Fe}_2\text{O}_3\text{@CTF-1}$ | Coprecipitation | STEM: 5–7 nm                                                                                    | $1049 \text{ m}^2 \text{ g}^{-1}$  | -                         | As(III)     | $C_0=0.1 \text{ mg L}^{-1}$                                     |                                    | $T=25^\circ\text{C}$<br>$\text{pH}=7$<br>$\text{dose}=4 \text{ g L}^{-1}$     | <b>Pseudo-second order:</b><br>$q_e=1.859 \text{ mg g}^{-1}$<br>$k_2^{-1}=-3.709 \text{ mg min g}^{-1}$<br>$R^2=0.9999$                                                                                                                                                                                                                                   |                    | [67]      |
|                                             |                 |                                                                                                 |                                    |                           | As(V)       | $C_0=0.1 \text{ mg L}^{-1}$<br>$t_e<24 \text{ h}$ (few minutes) |                                    |                                                                               | <b>Pseudo-second order:</b><br>$q_e=1.859 \text{ mg g}^{-1}$<br>$k_2^{-1}=-3.709 \text{ mg min g}^{-1}$<br>$R^2=0.9999$                                                                                                                                                                                                                                   |                    |           |

|                                                      |                                                           |                                                                                    |                                         |   |         |                                                               |                              |                                             |                                                                                                                                                                                                                                                                                                                                                                                                                                                                                                                                                                                                                                                                                              |      |
|------------------------------------------------------|-----------------------------------------------------------|------------------------------------------------------------------------------------|-----------------------------------------|---|---------|---------------------------------------------------------------|------------------------------|---------------------------------------------|----------------------------------------------------------------------------------------------------------------------------------------------------------------------------------------------------------------------------------------------------------------------------------------------------------------------------------------------------------------------------------------------------------------------------------------------------------------------------------------------------------------------------------------------------------------------------------------------------------------------------------------------------------------------------------------------|------|
| Fe <sub>2</sub> O <sub>3</sub> -ZrO <sub>2</sub> /BC | Coprecipitation                                           | TEM: 17-22 nm<br>XRD: 54nm<br>irregular shape                                      | -                                       | - | As(III) | C <sub>0</sub> =1.0 mg L <sup>-1</sup><br>t <sub>e</sub> ~2 h | 0-0.12 mg L <sup>-1</sup>    | T=27 °C<br>dose= 2 g L <sup>-1</sup>        | <b>Langmuir:</b><br>q <sub>m</sub> =102.3 mg g <sup>-1</sup><br><b>Removal:</b><br>96.6 %                                                                                                                                                                                                                                                                                                                                                                                                                                                                                                                                                                                                    | [68] |
|                                                      |                                                           |                                                                                    |                                         |   |         |                                                               |                              |                                             | <b>Pseudo-second order:</b><br>q <sub>e</sub> =0.4586 mg g <sup>-1</sup><br>k <sub>2</sub> =45.0 g mg <sup>-1</sup> min <sup>-1</sup><br>R <sup>2</sup> =1<br><b>Langmuir:</b><br>q <sub>m</sub> =1.01 mg g <sup>-1</sup><br>k <sub>L</sub> =6.48 L mg <sup>-1</sup><br>R <sup>2</sup> =0.97<br><b>Freundlich:</b><br>k <sub>F</sub> =1.98 mg <sup>-1</sup> (Lmg <sup>-1</sup> ) <sup>1/n</sup><br>n=1.433<br>R <sup>2</sup> =0.99<br><b>Sips:</b><br>q <sub>s</sub> =0.99 mg g <sup>-1</sup><br>k <sub>s</sub> =0.996 L mg <sup>-1</sup><br>R <sup>2</sup> =0.98<br><b>Redlich-Peterson:</b><br>k <sub>r</sub> =2.897 L mg <sup>-1</sup><br>R <sup>2</sup> =0.99<br><b>Removal:</b><br>90 % |      |
|                                                      |                                                           |                                                                                    |                                         |   |         |                                                               |                              |                                             | <b>Pseudo-second order:</b><br>q <sub>e</sub> =11.36 mg g <sup>-1</sup><br>k <sub>2</sub> =0.02 g mg <sup>-1</sup> min <sup>-1</sup><br>R <sup>2</sup> =0.99<br><b>Langmuir:</b><br>q <sub>m</sub> =85 mg g <sup>-1</sup><br><b>Removal:</b><br>86 %                                                                                                                                                                                                                                                                                                                                                                                                                                         |      |
|                                                      |                                                           |                                                                                    |                                         |   |         |                                                               |                              |                                             | <b>Langmuir:</b><br>q <sub>m</sub> =178.5 mmol kg <sup>-1</sup><br>R <sup>2</sup> >0.99                                                                                                                                                                                                                                                                                                                                                                                                                                                                                                                                                                                                      |      |
|                                                      |                                                           |                                                                                    |                                         |   |         |                                                               |                              |                                             | <b>Freundlich:</b><br>k <sub>F</sub> =1.79 mg g <sup>-1</sup><br>n=2.05<br><b>Freundlich:</b><br>k <sub>F</sub> =3.38 mg g <sup>-1</sup><br>n=1.5<br><b>Langmuir:</b><br>q <sub>m</sub> =90 mg g <sup>-1</sup>                                                                                                                                                                                                                                                                                                                                                                                                                                                                               |      |
| BCA-Fe                                               | Coprecipitation<br>(BCA is synthesized by another method) | TEM-EDS: 10-25 nm<br>for Fe <sub>3</sub> O <sub>4</sub><br>porous                  | 482.4 m <sup>2</sup><br>g <sup>-1</sup> | - | As(V)   | C <sub>0</sub> =10 mg L <sup>-1</sup><br>t <sub>e</sub> =1 h  | 2.5-1000 mg L <sup>-1</sup>  | T=25 °C<br>pH=7<br>dose=2 g L <sup>-1</sup> | <b>Langmuir:</b><br>q <sub>m</sub> =85 mg g <sup>-1</sup><br><b>Removal:</b><br>86 %                                                                                                                                                                                                                                                                                                                                                                                                                                                                                                                                                                                                         | [69] |
| HFe10k                                               | Coprecipitation and calcination                           | XRD: 20 nm (nanoy-Fe <sub>2</sub> O <sub>3</sub> )<br>spherical in ~50 nm clusters | 65.4 m <sup>2</sup><br>g <sup>-1</sup>  | - | As(V)   | -                                                             | 0.01-25 mmol L <sup>-1</sup> | T=22 °C<br>pH=5<br>dose=20 gL <sup>-1</sup> | <b>Langmuir:</b><br>q <sub>m</sub> =178.5 mmol kg <sup>-1</sup><br>R <sup>2</sup> >0.99                                                                                                                                                                                                                                                                                                                                                                                                                                                                                                                                                                                                      | [70] |
| Fe <sub>3</sub> O <sub>4</sub>                       | Coprecipitation                                           | DLS: 248 nm                                                                        | 35 m <sup>2</sup> g <sup>-1</sup>       | - | As(III) | C <sub>0</sub> =2 mg L <sup>-1</sup><br>t <sub>e</sub> ~5 h   | 2-400 mg L <sup>-1</sup>     | T=27 °C pH=7<br>dose=4 g L <sup>-1</sup>    | <b>Freundlich:</b><br>k <sub>F</sub> =1.79 mg g <sup>-1</sup><br>n=2.05                                                                                                                                                                                                                                                                                                                                                                                                                                                                                                                                                                                                                      | [71] |
|                                                      |                                                           |                                                                                    |                                         |   | As(V)   | C <sub>0</sub> =2 mg L <sup>-1</sup><br>t <sub>e</sub> ~5 h   | 2-400 mg L <sup>-1</sup>     | T=27 °C pH=7<br>dose=4 g L <sup>-1</sup>    | <b>Freundlich:</b><br>k <sub>F</sub> =3.38 mg g <sup>-1</sup><br>n=1.5                                                                                                                                                                                                                                                                                                                                                                                                                                                                                                                                                                                                                       |      |
| BC-Fe                                                | Coprecipitation                                           | -                                                                                  | 28.9 m <sup>2</sup><br>g <sup>-1</sup>  | - | As(V)   | t <sub>e</sub> =2 h                                           | 0.1-1 mg L <sup>-1</sup>     | T=25 °C<br>pH=7                             | <b>Langmuir:</b><br>q <sub>m</sub> =90 mg g <sup>-1</sup>                                                                                                                                                                                                                                                                                                                                                                                                                                                                                                                                                                                                                                    | [72] |

|                                                                |                 |                                                                                                                                                                                                                                                                                           |                                   |                        |         |                                                               |                          |                                                  |                                                                                                                                                                                                                                                                                                                                                                                                                                                                                                                                                                                                                                                                                                                                                                                                                                                                                                                                                                                                                                                                                                                                                                                                                                                                                                                                                                                                                                                         |      |
|----------------------------------------------------------------|-----------------|-------------------------------------------------------------------------------------------------------------------------------------------------------------------------------------------------------------------------------------------------------------------------------------------|-----------------------------------|------------------------|---------|---------------------------------------------------------------|--------------------------|--------------------------------------------------|---------------------------------------------------------------------------------------------------------------------------------------------------------------------------------------------------------------------------------------------------------------------------------------------------------------------------------------------------------------------------------------------------------------------------------------------------------------------------------------------------------------------------------------------------------------------------------------------------------------------------------------------------------------------------------------------------------------------------------------------------------------------------------------------------------------------------------------------------------------------------------------------------------------------------------------------------------------------------------------------------------------------------------------------------------------------------------------------------------------------------------------------------------------------------------------------------------------------------------------------------------------------------------------------------------------------------------------------------------------------------------------------------------------------------------------------------------|------|
| $\gamma$ -Fe <sub>2</sub> O <sub>3</sub> -TiO <sub>2</sub> -GO | Coprecipitation | TEM: 9 nm ( $\gamma$ -Fe <sub>2</sub> O <sub>3</sub> ) spherical $\gamma$ -Fe <sub>2</sub> O <sub>3</sub> Agglomerate TiO <sub>2</sub> (50 nm) and well defined using GO XRD: 9 nm a=8.3789 Å for $\gamma$ -Fe <sub>2</sub> O <sub>3</sub> a=3.7867 Å and b=9.4393 Å for TiO <sub>2</sub> | 82 m <sup>2</sup> g <sup>-1</sup> | 60 emu g <sup>-1</sup> | As(III) | C <sub>0</sub> =33 mg L <sup>-1</sup><br>t <sub>c</sub> =20 h | 1-400 mg L <sup>-1</sup> | T=25 °C<br>pH=6.5<br>dose=0.56 g L <sup>-1</sup> | <b>Pseudo-second order:</b><br>q <sub>e</sub> =25.3 mg g <sup>-1</sup><br>k <sub>2</sub> =0.0013 g mg <sup>-1</sup> min <sup>-1</sup><br>R <sup>2</sup> =0.9998<br><b>Langmuir:</b><br>q <sub>m</sub> =110.4 mg g <sup>-1</sup><br>k <sub>L</sub> =0.06 L mg <sup>-1</sup><br>R <sup>2</sup> =0.986<br><b>Freundlich:</b><br>k <sub>F</sub> =13.7 mg g <sup>-1</sup><br>n=2.27<br>R <sup>2</sup> =0.949<br><b>Sips:</b><br>q <sub>s</sub> =121.1 mg g <sup>-1</sup><br>k <sub>s</sub> =0.07 (L mg <sup>-1</sup> ) <sup>m</sup><br>m=0.88<br>R <sup>2</sup> =0.984<br><b>Redlich-Peterson:</b><br>A=7.9 L g <sup>-1</sup><br>B=0.14 L mg <sup>-1</sup><br>R <sup>2</sup> =0.983<br><b>Removal:</b><br>73 %<br><b>Langmuir:</b><br>q <sub>m</sub> =127.2 mg g <sup>-1</sup><br>k <sub>L</sub> =0.13 L mg <sup>-1</sup><br>R <sup>2</sup> =0.997<br><b>Freundlich:</b><br>k <sub>F</sub> =45.8 mg g <sup>-1</sup><br>n=5.39<br>R <sup>2</sup> =0.93<br><b>Sips:</b><br>q <sub>s</sub> =130.1 mg g <sup>-1</sup><br>k <sub>s</sub> =0.159 (L mg <sup>-1</sup> ) <sup>m</sup><br>m=0.88<br>R <sup>2</sup> =0.998<br><b>Redlich-Peterson:</b><br>A=21.1 L g <sup>-1</sup><br>B=0.217 L mg <sup>-1</sup><br>R <sup>2</sup> =0.996<br><b>Removal:</b><br>85 %<br><b>Langmuir:</b><br>q <sub>m</sub> =17.2 mg g <sup>-1</sup><br>k <sub>L</sub> =0.4 L mg <sup>-1</sup><br>R <sup>2</sup> =0.954<br><b>Freundlich:</b><br>k <sub>F</sub> =7.4 mg g <sup>-1</sup> | [42] |
|                                                                |                 |                                                                                                                                                                                                                                                                                           |                                   |                        | As(V)   |                                                               |                          |                                                  | <b>Pseudo-second order:</b><br>q <sub>e</sub> =25.3 mg g <sup>-1</sup><br>k <sub>2</sub> =0.0013 g mg <sup>-1</sup> min <sup>-1</sup><br>R <sup>2</sup> =0.9998<br><b>Langmuir:</b><br>q <sub>m</sub> =110.4 mg g <sup>-1</sup><br>k <sub>L</sub> =0.06 L mg <sup>-1</sup><br>R <sup>2</sup> =0.986<br><b>Freundlich:</b><br>k <sub>F</sub> =13.7 mg g <sup>-1</sup><br>n=2.27<br>R <sup>2</sup> =0.949<br><b>Sips:</b><br>q <sub>s</sub> =121.1 mg g <sup>-1</sup><br>k <sub>s</sub> =0.07 (L mg <sup>-1</sup> ) <sup>m</sup><br>m=0.88<br>R <sup>2</sup> =0.984<br><b>Redlich-Peterson:</b><br>A=7.9 L g <sup>-1</sup><br>B=0.14 L mg <sup>-1</sup><br>R <sup>2</sup> =0.983<br><b>Removal:</b><br>73 %<br><b>Langmuir:</b><br>q <sub>m</sub> =127.2 mg g <sup>-1</sup><br>k <sub>L</sub> =0.13 L mg <sup>-1</sup><br>R <sup>2</sup> =0.997<br><b>Freundlich:</b><br>k <sub>F</sub> =45.8 mg g <sup>-1</sup><br>n=5.39<br>R <sup>2</sup> =0.93<br><b>Sips:</b><br>q <sub>s</sub> =130.1 mg g <sup>-1</sup><br>k <sub>s</sub> =0.159 (L mg <sup>-1</sup> ) <sup>m</sup><br>m=0.88<br>R <sup>2</sup> =0.998<br><b>Redlich-Peterson:</b><br>A=21.1 L g <sup>-1</sup><br>B=0.217 L mg <sup>-1</sup><br>R <sup>2</sup> =0.996<br><b>Removal:</b><br>85 %<br><b>Langmuir:</b><br>q <sub>m</sub> =17.2 mg g <sup>-1</sup><br>k <sub>L</sub> =0.4 L mg <sup>-1</sup><br>R <sup>2</sup> =0.954<br><b>Freundlich:</b><br>k <sub>F</sub> =7.4 mg g <sup>-1</sup> |      |
| MBP                                                            | Coprecipitation | TEM: 10 nm                                                                                                                                                                                                                                                                                | -                                 | 45 emu g <sup>-1</sup> | As(III) | -                                                             | 5-300                    | T=25 °C<br>pH=6<br>dose=2 g L <sup>-1</sup>      | <b>Pseudo-second order:</b><br>q <sub>e</sub> =25.3 mg g <sup>-1</sup><br>k <sub>2</sub> =0.0013 g mg <sup>-1</sup> min <sup>-1</sup><br>R <sup>2</sup> =0.9998<br><b>Langmuir:</b><br>q <sub>m</sub> =110.4 mg g <sup>-1</sup><br>k <sub>L</sub> =0.06 L mg <sup>-1</sup><br>R <sup>2</sup> =0.986<br><b>Freundlich:</b><br>k <sub>F</sub> =13.7 mg g <sup>-1</sup><br>n=2.27<br>R <sup>2</sup> =0.949<br><b>Sips:</b><br>q <sub>s</sub> =121.1 mg g <sup>-1</sup><br>k <sub>s</sub> =0.07 (L mg <sup>-1</sup> ) <sup>m</sup><br>m=0.88<br>R <sup>2</sup> =0.984<br><b>Redlich-Peterson:</b><br>A=7.9 L g <sup>-1</sup><br>B=0.14 L mg <sup>-1</sup><br>R <sup>2</sup> =0.983<br><b>Removal:</b><br>73 %<br><b>Langmuir:</b><br>q <sub>m</sub> =127.2 mg g <sup>-1</sup><br>k <sub>L</sub> =0.13 L mg <sup>-1</sup><br>R <sup>2</sup> =0.997<br><b>Freundlich:</b><br>k <sub>F</sub> =45.8 mg g <sup>-1</sup><br>n=5.39<br>R <sup>2</sup> =0.93<br><b>Sips:</b><br>q <sub>s</sub> =130.1 mg g <sup>-1</sup><br>k <sub>s</sub> =0.159 (L mg <sup>-1</sup> ) <sup>m</sup><br>m=0.88<br>R <sup>2</sup> =0.998<br><b>Redlich-Peterson:</b><br>A=21.1 L g <sup>-1</sup><br>B=0.217 L mg <sup>-1</sup><br>R <sup>2</sup> =0.996<br><b>Removal:</b><br>85 %<br><b>Langmuir:</b><br>q <sub>m</sub> =17.2 mg g <sup>-1</sup><br>k <sub>L</sub> =0.4 L mg <sup>-1</sup><br>R <sup>2</sup> =0.954<br><b>Freundlich:</b><br>k <sub>F</sub> =7.4 mg g <sup>-1</sup> | [73] |

|                                          |                                                              |                                           |                                    |                                                               |         |                                                               |                         |                                               |                                                                                                                                                                                                                                      |      |
|------------------------------------------|--------------------------------------------------------------|-------------------------------------------|------------------------------------|---------------------------------------------------------------|---------|---------------------------------------------------------------|-------------------------|-----------------------------------------------|--------------------------------------------------------------------------------------------------------------------------------------------------------------------------------------------------------------------------------------|------|
|                                          |                                                              |                                           |                                    |                                                               |         |                                                               |                         |                                               | n=5.7<br>$R^2=0.843$<br><b>Langmuir:</b><br>$q_m=43.9 \text{ mg g}^{-1}$<br>$k_L=1.2 \text{ L mg}^{-1}$<br>$R^2=0.832$<br><b>Freundlich:</b><br>$k_F=18.6 \text{ mg g}^{-1}$<br>$n=4.8$<br>$R^2=0.900$                               |      |
|                                          |                                                              |                                           |                                    |                                                               | As(V)   | -                                                             | 5-300                   | T=25 °C<br>pH=6<br>dose=2 g L <sup>-1</sup>   |                                                                                                                                                                                                                                      |      |
| Fe <sub>3</sub> O <sub>4</sub>           | Chemical Precipitation                                       | XRD: 84 nm<br>a=8.38523 Å                 | 12 m <sup>2</sup> g <sup>-1</sup>  | -                                                             | As(V)   | -                                                             | 0.1-8                   | T=20 °C<br>pH=7<br>dose=1 g L <sup>-1</sup>   | <b>Langmuir:</b><br>$q_m=1.386 \text{ mg g}^{-1}$<br>$k_L=8.06 \text{ L mg}^{-1}$<br>$R^2=0.9963$<br><b>Freundlich:</b><br>$k_F=1.045 \text{ mg g}^{-1}$<br>$n=6.35$<br>$R^2=0.9867$                                                 | [46] |
| Fe <sub>3</sub> O <sub>4</sub> :S        | Novel chemical synthesis method, like chemical precipitation | TEM: 4.34-13.46 nm<br>(avg. 7.84 nm)      | -                                  | 37.1 and 39.9 emu g <sup>-1</sup> before and after adsorption | As(V)   | C <sub>0</sub> =20 mg L <sup>-1</sup><br>t <sub>e</sub> =24 h | 5-50 mg L <sup>-1</sup> | T=30 °C<br>pH=6<br>dose=0.5 g L <sup>-1</sup> | <b>Pseudo-second order:</b><br>$q_e=42.44 \text{ mg g}^{-1}$<br>$k_2=0.00193 \text{ g mg}^{-1} \text{ min}^{-1}$<br>$R^2=0.999$<br><b>Langmuir:</b><br>$q_m=58.38 \text{ mg g}^{-1}$<br>$k_L=0.971 \text{ L mg}^{-1}$<br>$R^2=0.990$ | [75] |
| cellulose@Fe <sub>2</sub> O <sub>3</sub> | Coprecipitation                                              | TEM: 5-100 nm<br>XRD: 61 nm<br>a=8.3515 Å | 113 m <sup>2</sup> g <sup>-1</sup> | 13.2 emu g <sup>-1</sup>                                      | As(III) | -                                                             | 0~27 mg L <sup>-1</sup> |                                               | <b>Langmuir:</b><br>$q_m=23.16 \text{ mg g}^{-1}$<br>$k_L=0.48 \text{ L mg}^{-1}$<br>$R^2=0.9959$<br><b>Freundlich:</b><br>$k_F=9.64 \text{ mg g}^{-1}$<br>$n=3.78$<br>$R^2=0.9656$                                                  |      |
|                                          |                                                              |                                           |                                    |                                                               | As(V)   | -                                                             | 0~27 mg L <sup>-1</sup> | T=25 °C<br>pH=7<br>dose=1 g L <sup>-1</sup>   | <b>Langmuir:</b><br>$q_m=32.11 \text{ mg g}^{-1}$<br>$k_L=0.039 \text{ L mg}^{-1}$<br>$R^2=0.9836$<br><b>Freundlich:</b><br>$k_F=3.25 \text{ mg g}^{-1}$<br>$n=2.06$<br>$R^2=0.9961$                                                 | [47] |



|                                               |                                                        |                                                 |                                   |                          |         |                                                       |                          |                                                 |                                                                                                                    |      |
|-----------------------------------------------|--------------------------------------------------------|-------------------------------------------------|-----------------------------------|--------------------------|---------|-------------------------------------------------------|--------------------------|-------------------------------------------------|--------------------------------------------------------------------------------------------------------------------|------|
| MNPs ( $\gamma$ - $\text{Fe}_2\text{O}_3$ )   | Coprecipitation                                        | TEM: 23.5 nm<br>XRD: 5.9 nm<br>irregular shaped | 145.5 $\text{m}^2 \text{g}^{-1}$  | 35.5 $\text{emu g}^{-1}$ | As(V)   | $C_0=0.4 \text{ mg L}^{-1}$<br>$t_e \sim 1 \text{ h}$ | 0-10 $\text{mg L}^{-1}$  | T=25 °C<br>pH=6.6<br>dose=0.2 $\text{g L}^{-1}$ | Langmuir:<br>$q_m=12.74 \text{ mg g}^{-1}$<br>$k_L=6.03 \text{ L mg}^{-1}$<br>$R^2=0.898$<br>Removal:<br>95 %      | [77] |
| c-MNPs                                        | Coprecipitation and heterogeneous nucleation technique | TEM: 37.0 nm<br>XRD: 4.9 nm<br>irregular shaped | 157.1 $\text{m}^2 \text{g}^{-1}$  | 36.4 $\text{emu g}^{-1}$ | As(V)   | $C_0=0.4 \text{ mg L}^{-1}$<br>$t_e \sim 1 \text{ h}$ | 0-15 $\text{mg L}^{-1}$  |                                                 | Langmuir:<br>$q_m=26.05 \text{ mg g}^{-1}$<br>$k_L=0.34 \text{ L mg}^{-1}$<br>$R^2=0.901$<br>Removal:<br>>95 %     |      |
| $\text{Fe}_3\text{O}_4$                       | Chemical precipitation                                 | TEM: 5 nm<br>XRD: 5 nm                          | 179 $\text{m}^2 \text{g}^{-1}$    | 40 $\text{emu g}^{-1}$   | As(III) | -                                                     | 0-70 $\text{mg L}^{-1}$  | T=27 °C<br>pH=7<br>dose=60 $\text{mg L}^{-1}$   | Langmuir:<br>$q_m=46.06 \text{ mg g}^{-1}$<br>$k_L=0.1686 \text{ L mg}^{-1}$<br>Removal:<br>Maximum removal=97.5 % | [78] |
|                                               |                                                        |                                                 |                                   |                          | As(V)   | -                                                     | 0-50 $\text{mg L}^{-1}$  | T=27 °C<br>pH=7<br>dose=60 $\text{mg L}^{-1}$   | Langmuir:<br>$q_m=16.56 \text{ mg g}^{-1}$<br>$k_L=1.42 \text{ L mg}^{-1}$<br>Removal:<br>97.5 %                   |      |
| $\text{Fe}_3\text{O}_4@\text{CuO}\&\text{GO}$ | A modified precipitation method                        | TEM: 20 nm<br>spherical and packed              | 159.60 $\text{m}^2 \text{g}^{-1}$ | 30 $\text{emu g}^{-1}$   | As(III) | $C_0=15 \text{ mg L}^{-1}$<br>$t_e=12 \text{ h}$      | 0~80 $\text{mg L}^{-1}$  | T=25 °C<br>pH=7<br>dose=120 $\text{mg L}^{-1}$  | Langmuir:<br>$q_m=70.36 \text{ mg g}^{-1}$                                                                         | [79] |
|                                               |                                                        |                                                 |                                   |                          | As(V)   | $C_0=15 \text{ mg L}^{-1}$<br>$t_e=12 \text{ h}$      | 0~80 $\text{mg L}^{-1}$  | T=25 °C<br>pH=7<br>dose=120 $\text{mg L}^{-1}$  | Langmuir:<br>$q_m=62.60 \text{ mg g}^{-1}$                                                                         |      |
| Starch-bridged $\text{Fe}_3\text{O}_4$        | A modified coprecipitation method                      | TEM: 26.6 nm<br>spherical shape                 | -                                 | -                        | As(V)   | $t_e=4 \text{ h}$                                     | 0-400 $\text{mg L}^{-1}$ | T=21 °C<br>pH=5<br>dose=1.7 $\text{g L}^{-1}$   | Langmuir:<br>$q_m=248.0 \text{ mg g}^{-1}$<br>$k_L=0.5 \text{ L mg}^{-1}$<br>Removal:<br>>98 %                     | [80] |
| $\gamma\text{-Fe}_2\text{O}_3$                | Commercial                                             | TEM: 18.4 nm                                    | 51 $\text{m}^2 \text{g}^{-1}$     | 71.7 $\text{emu g}^{-1}$ |         | $t_e \sim 20 \text{ h}$                               | 1-11 $\text{mg L}^{-1}$  | T=23 °C<br>pH=7<br>dose=250 $\text{mg L}^{-1}$  | Langmuir:<br>$q_m=5 \text{ mg g}^{-1}$                                                                             | [81] |
| $\gamma\text{-Fe}_2\text{O}_3$                | Sol-gel                                                | TEM: 12.1 nm                                    | 90.4 $\text{m}^2 \text{g}^{-1}$   | 64.3 $\text{emu g}^{-1}$ | As(V)   |                                                       |                          | T=23 °C<br>pH=7<br>dose=100 $\text{mg L}^{-1}$  | Langmuir:<br>$q_m=11.1 \text{ mg g}^{-1}$                                                                          |      |

|                                                                                   |                                                                     |                                                  |                                       |                          |            |                                                                |                             |                                                                  |                                                                                                                                                                                                                                                                                                                                 |      |
|-----------------------------------------------------------------------------------|---------------------------------------------------------------------|--------------------------------------------------|---------------------------------------|--------------------------|------------|----------------------------------------------------------------|-----------------------------|------------------------------------------------------------------|---------------------------------------------------------------------------------------------------------------------------------------------------------------------------------------------------------------------------------------------------------------------------------------------------------------------------------|------|
| $\gamma$ -Fe <sub>2</sub> O <sub>3</sub>                                          | Mechanochemical                                                     | TEM: 3.8 nm                                      | 203.2 m <sup>2</sup> g <sup>-1</sup>  | 19.6 emu g <sup>-1</sup> |            |                                                                |                             | L <sup>-1</sup><br>T=23 °C<br>pH=7<br>dose=60 mg L <sup>-1</sup> | <b>Langmuir:</b><br>q <sub>m</sub> =20 mg g <sup>-1</sup>                                                                                                                                                                                                                                                                       |      |
| Fe <sub>3</sub> O <sub>4</sub> - $\gamma$ -Fe <sub>2</sub> O <sub>3</sub> mixture | Electrical wire explosion (EWE)                                     | TEM: 34 nm<br>a=8.3763 Å                         | 12 m <sup>2</sup> g <sup>-1</sup>     | 91.8 emu g <sup>-1</sup> | As(III)    | -                                                              | 1-7 mg L <sup>-1</sup>      | T=25 °C<br>pH=6<br>dose=1 g L <sup>-1</sup>                      | <b>Langmuir:</b><br>q <sub>m</sub> =2.9 mg g <sup>-1</sup>                                                                                                                                                                                                                                                                      | [82] |
|                                                                                   |                                                                     |                                                  |                                       |                          | As(V)      | -                                                              | 1-7 mg L <sup>-1</sup>      | T=25 °C<br>pH=6<br>dose=1 g L <sup>-1</sup>                      | <b>Langmuir:</b><br>q <sub>m</sub> =3.1 mg g <sup>-1</sup>                                                                                                                                                                                                                                                                      |      |
| Mesoporous $\gamma$ -Fe <sub>2</sub> O <sub>3</sub>                               | A described in the reference hydrothermal process                   | spherical shape                                  | 35.7 m <sup>2</sup> g <sup>-1</sup>   | 16.6 emu g <sup>-1</sup> | As(V)      | -                                                              | 0-80 mg L <sup>-1</sup>     | dose=0.1 g L <sup>-1</sup>                                       | <b>Langmuir:</b><br>q <sub>m</sub> =73.2 mg g <sup>-1</sup><br>k <sub>L</sub> =0.39 L mg <sup>-1</sup>                                                                                                                                                                                                                          | [83] |
| BMN nanocomposites                                                                | A one-step pyrolysis process                                        | TEM: 20 nm                                       | -                                     | -                        | As(III)    | C <sub>0</sub> =10 mg L <sup>-1</sup><br>t <sub>e</sub> =6 h   | 0.5-50 mg L <sup>-1</sup>   | T=25 °C<br>pH=7<br>dose=2 g L <sup>-1</sup>                      | <b>Langmuir:</b><br>q <sub>m</sub> =16.23 mg g <sup>-1</sup><br><b>Removal:</b><br>90 %                                                                                                                                                                                                                                         | [84] |
| 20%FBC                                                                            | Thermal pyrolysis                                                   | -                                                | 297.13 m <sup>2</sup> g <sup>-1</sup> | 67.2 emu g <sup>-1</sup> | As(V)      | C <sub>0</sub> =10 mg L <sup>-1</sup><br>t <sub>e</sub> =24 h  | 0.25-100 mg L <sup>-1</sup> | T=25 °C<br>pH=7<br>dose=5 g L <sup>-1</sup>                      | <b>Langmuir:</b><br>q <sub>m</sub> =6.8 mg g <sup>-1</sup><br><b>Removal:</b><br>86.48 %                                                                                                                                                                                                                                        | [85] |
| Fe <sub>3</sub> O <sub>4</sub> @TiO <sub>2</sub> magnetic nanosheets              | Sol-gel method and a hydrothermal assisted crystallization strategy | AFM: ~1.5 nm (thickness)<br>XRD: 9 nm nanosheets | 89.4 m <sup>2</sup> g <sup>-1</sup>   | 20 emu g <sup>-1</sup>   |            |                                                                |                             |                                                                  | <b>Pseudo-second order:</b><br>q <sub>e</sub> =3.07 mg g <sup>-1</sup><br>k <sub>2</sub> =0.031 g mg <sup>-1</sup> min <sup>-1</sup><br>R <sup>2</sup> =0.994<br><b>Langmuir:</b><br>q <sub>m</sub> =30.96 mg g <sup>-1</sup><br>k <sub>L</sub> =0.6538 L mg <sup>-1</sup><br>R <sup>2</sup> =0.997<br><b>Removal:</b><br>>90 % | [86] |
|                                                                                   |                                                                     |                                                  |                                       |                          | As(III)+UV | C <sub>0</sub> =0.91 mg L <sup>-1</sup><br>t <sub>e</sub> =2 h | 0-55 mg L <sup>-1</sup>     |                                                                  |                                                                                                                                                                                                                                                                                                                                 |      |
| Fe <sub>3</sub> O <sub>4</sub>                                                    |                                                                     | TEM: 50 nm                                       |                                       | 38.9 emu g <sup>-1</sup> |            |                                                                |                             |                                                                  |                                                                                                                                                                                                                                                                                                                                 | [87] |
|                                                                                   |                                                                     |                                                  |                                       |                          | As(V)      | -                                                              | 2-75 mg L <sup>-1</sup>     | T=27 °C                                                          | <b>Langmuir:</b>                                                                                                                                                                                                                                                                                                                |      |
|                                                                                   |                                                                     |                                                  |                                       |                          |            |                                                                |                             |                                                                  | <b>Pseudo-second order:</b><br>q <sub>e</sub> =3.35 mg g <sup>-1</sup><br>k <sub>2</sub> =0.147 g mg <sup>-1</sup> min <sup>-1</sup><br>R <sup>2</sup> =0.999<br><b>Langmuir:</b><br>q <sub>m</sub> =36.36 mg g <sup>-1</sup><br>k <sub>L</sub> =0.5288 L mg <sup>-1</sup><br>R <sup>2</sup> =0.995<br><b>Removal:</b><br>>90 % |      |

|                                |                                |                                                               |                                     |                          |       |                                                                 |                            |                                               |                                                                                                                                                                                                                                                                                                                              |      |
|--------------------------------|--------------------------------|---------------------------------------------------------------|-------------------------------------|--------------------------|-------|-----------------------------------------------------------------|----------------------------|-----------------------------------------------|------------------------------------------------------------------------------------------------------------------------------------------------------------------------------------------------------------------------------------------------------------------------------------------------------------------------------|------|
|                                | A one-pot hydrothermal process |                                                               | 30.1 m <sup>2</sup> g <sup>-1</sup> |                          |       |                                                                 |                            | pH=7<br>dose=0.1 g L <sup>-1</sup>            | q <sub>m</sub> =92.85 mg g <sup>-1</sup><br>k <sub>L</sub> =0.046 L mg <sup>-1</sup><br>R <sup>2</sup> =0.90<br><b>Freundlich:</b><br>k <sub>F</sub> =9.10 mg <sup>1+n</sup> g <sup>-1</sup> L<br>1/n=0.49<br>R <sup>2</sup> =0.96                                                                                           |      |
| Fe <sub>3</sub> O <sub>4</sub> | Obtained from red mud          | TEM: 8-13 nm (9 nm)<br>XRD (SAXS): 9.77 nm<br>spherical shape | -                                   | 55.3 emu g <sup>-1</sup> | As(V) | C <sub>0</sub> =50 µg L <sup>-1</sup><br>t <sub>e</sub> =45 min | 10-1000 µg L <sup>-1</sup> | T=25 °C<br>pH=2.5<br>dose=8 g L <sup>-1</sup> | <b>Pseudo-second order:</b><br>q <sub>e</sub> =5.21 µg g <sup>-1</sup><br>k <sub>2</sub> =0.08 g mg <sup>-1</sup> min <sup>-1</sup><br>R <sup>2</sup> =0.999<br><b>Langmuir:</b><br>q <sub>m</sub> =400 µg g <sup>-1</sup><br>k <sub>L</sub> =0.003 L µg <sup>-1</sup><br>R <sup>2</sup> =0.968<br><b>Removal:</b><br>99.2 % | [88] |

**Table S2:** Adsorption parameters for removal of arsenic and other pollutants from water using diverse magnetic nanohybrids.

| Adsorbent                             | Synthesis method | Size and shape                                                            | Surface area                          | Saturation magnetization | Adsorbates       | Initial concentration (C <sub>0</sub> ) and equilibrium time (t <sub>e</sub> )                                               | Concentration range in isotherm experiments | Adsorption conditions                           | Other pollutants            | Kinetic and isothermal parameters                                                                                                                                                                                                                                                                         | Ref. |
|---------------------------------------|------------------|---------------------------------------------------------------------------|---------------------------------------|--------------------------|------------------|------------------------------------------------------------------------------------------------------------------------------|---------------------------------------------|-------------------------------------------------|-----------------------------|-----------------------------------------------------------------------------------------------------------------------------------------------------------------------------------------------------------------------------------------------------------------------------------------------------------|------|
| Fe <sub>3</sub> O <sub>4</sub>        | Co-precipitation | TEM: 10 nm spherical NPs                                                  | -                                     | -                        | As(III)          | C <sub>0</sub> =10 µmol L <sup>-1</sup><br>t <sub>e</sub> =24 h                                                              | -                                           | T=27 °C<br>pH=6-8<br>dose=1 g L <sup>-1</sup>   | HA<br>5 mg L <sup>-1</sup>  | Removal=90%                                                                                                                                                                                                                                                                                               | [90] |
|                                       |                  |                                                                           |                                       |                          |                  | C <sub>0</sub> =100 µmol L <sup>-1</sup><br>t <sub>e</sub> =24 h                                                             |                                             |                                                 | HA<br>5 mg L <sup>-1</sup>  | Removal=94.3%                                                                                                                                                                                                                                                                                             |      |
|                                       |                  |                                                                           |                                       |                          |                  | C <sub>0</sub> =10 µmol L <sup>-1</sup><br>t <sub>e</sub> =24 h                                                              |                                             |                                                 | HA<br>50 mg L <sup>-1</sup> | Removal=90.1%                                                                                                                                                                                                                                                                                             |      |
|                                       |                  |                                                                           |                                       |                          |                  | C <sub>0</sub> =100 µmol L <sup>-1</sup><br>t <sub>e</sub> =24 h                                                             |                                             |                                                 | HA<br>50 mg L <sup>-1</sup> | Removal=89.3%                                                                                                                                                                                                                                                                                             |      |
| GO-Fe <sub>3</sub> O <sub>4</sub> -HA | Co-precipitation | TEM: Fe <sub>3</sub> O <sub>4</sub> (8 nm) assembled along the GO sheets. | 0.9060 m <sup>2</sup> g <sup>-1</sup> | -                        | As(III)          | C <sub>0</sub> =10 mg L <sup>-1</sup><br>t <sub>e</sub> =24 h                                                                | 1 - 10 mg L <sup>-1</sup>                   | T=23 °C<br>pH=7<br>dose=0.2 g L <sup>-1</sup>   | HA<br>2 g L <sup>-1</sup>   | <b>Langmuir:</b><br>q <sub>m</sub> =16 mg g <sup>-1</sup><br>k <sub>L</sub> =0.787 L mg <sup>-1</sup>                                                                                                                                                                                                     | [91] |
|                                       |                  |                                                                           |                                       |                          |                  | C <sub>0</sub> =10 mg L <sup>-1</sup><br>t <sub>e</sub> =24 h                                                                |                                             |                                                 | HA<br>2 g L <sup>-1</sup>   | <b>Langmuir:</b><br>q <sub>m</sub> =16 mg g <sup>-1</sup><br>k <sub>L</sub> =0.787 L mg <sup>-1</sup>                                                                                                                                                                                                     |      |
|                                       |                  |                                                                           |                                       |                          | As(V)            | C <sub>0</sub> =10 mg L <sup>-1</sup><br>t <sub>e</sub> =24 h                                                                | 1 - 10 mg L <sup>-1</sup>                   | T=23 °C<br>pH=7<br>dose=0.2 g L <sup>-1</sup>   | HA<br>2 g L <sup>-1</sup>   | <b>Pseudo-second order:</b><br>q <sub>e</sub> =0.96 mg g <sup>-1</sup> As(III)<br>k <sub>2</sub> =0.35 g mg <sup>-1</sup> min <sup>-1</sup><br>R <sup>2</sup> =0.99<br>q <sub>e</sub> =0.99 mg g <sup>-1</sup> As(V)<br>k <sub>2</sub> =1.31 g mg <sup>-1</sup> min <sup>-1</sup><br>R <sup>2</sup> =0.99 |      |
|                                       |                  |                                                                           |                                       |                          |                  | C <sub>0</sub> =10 mg L <sup>-1</sup><br>t <sub>e</sub> =24 h                                                                |                                             |                                                 | HA<br>2 g L <sup>-1</sup>   | <b>Langmuir:</b><br>q <sub>m</sub> =16 mg g <sup>-1</sup><br>k <sub>L</sub> =0.787 L mg <sup>-1</sup>                                                                                                                                                                                                     |      |
| HA-Fe <sub>3</sub> O <sub>4</sub>     | Co-precipitation | TEM: 10.6 nm                                                              | -                                     | 68.1 emu g <sup>-1</sup> | As(III)<br>As(V) | C <sub>0</sub> =0.2 mg L <sup>-1</sup><br>As(III)<br>C <sub>0</sub> =0.2 mg L <sup>-1</sup><br>As(V)<br>t <sub>e</sub> = 3 h | 1 - 10 mg L <sup>-1</sup>                   | T=25 °C<br>pH=6.6<br>dose=0.2 g L <sup>-1</sup> | -                           | <b>Pseudo-second order:</b><br>q <sub>e</sub> =0.96 mg g <sup>-1</sup> As(III)<br>k <sub>2</sub> =0.35 g mg <sup>-1</sup> min <sup>-1</sup><br>R <sup>2</sup> =0.99<br>q <sub>e</sub> =0.99 mg g <sup>-1</sup> As(V)<br>k <sub>2</sub> =1.31 g mg <sup>-1</sup> min <sup>-1</sup><br>R <sup>2</sup> =0.99 | [92] |
|                                       |                  |                                                                           |                                       |                          |                  | C <sub>0</sub> =0.2 mg L <sup>-1</sup><br>As(III)<br>C <sub>0</sub> =0.2 mg L <sup>-1</sup><br>As(V)<br>t <sub>e</sub> = 3 h |                                             |                                                 |                             | <b>Langmuir:</b><br>q <sub>m</sub> =12.2 mg g <sup>-1</sup> As(III)<br>k <sub>L</sub> =3.46 L mg <sup>-1</sup><br>R <sup>2</sup> =0.96<br>q <sub>m</sub> =12.6 mg g <sup>-1</sup> As(V)<br>k <sub>L</sub> =4.88 L mg <sup>-1</sup><br>R <sup>2</sup> =0.94                                                |      |
|                                       |                  |                                                                           |                                       |                          |                  | C <sub>0</sub> =0.2 mg L <sup>-1</sup><br>As(III)<br>C <sub>0</sub> =0.2 mg L <sup>-1</sup><br>As(V)<br>t <sub>e</sub> = 3 h |                                             |                                                 |                             | <b>Freundlich:</b><br>k <sub>F</sub> =2.96 L g <sup>-1</sup> As(III)<br>n=1.75<br>R <sup>2</sup> =0.99<br>k <sub>F</sub> =2.30 L g <sup>-1</sup> As(V)<br>n=3.57<br>R <sup>2</sup> =0.99                                                                                                                  |      |
|                                       |                  |                                                                           |                                       |                          |                  | C <sub>0</sub> =0.2 mg L <sup>-1</sup><br>As(III)<br>C <sub>0</sub> =0.2 mg L <sup>-1</sup><br>As(V)<br>t <sub>e</sub> = 3 h |                                             |                                                 |                             | <b>Freundlich:</b><br>k <sub>F</sub> =2.96 L g <sup>-1</sup> As(III)<br>n=1.75<br>R <sup>2</sup> =0.99<br>k <sub>F</sub> =2.30 L g <sup>-1</sup> As(V)<br>n=3.57<br>R <sup>2</sup> =0.99                                                                                                                  |      |

|                                             |                                            |                                                                                                                                                                                                                     |                                     |   |  |       |                                                                  |                             |                                                 |                                                 |                                                                                                                                                                                                     |                                                                                                                                                                 |                                                           |                                          |
|---------------------------------------------|--------------------------------------------|---------------------------------------------------------------------------------------------------------------------------------------------------------------------------------------------------------------------|-------------------------------------|---|--|-------|------------------------------------------------------------------|-----------------------------|-------------------------------------------------|-------------------------------------------------|-----------------------------------------------------------------------------------------------------------------------------------------------------------------------------------------------------|-----------------------------------------------------------------------------------------------------------------------------------------------------------------|-----------------------------------------------------------|------------------------------------------|
| NC-MA /L-<br>Fe <sub>3</sub> O <sub>4</sub> | Magnetic stirring and ultrasonic treatment | XRD: 22 nm Fe <sub>3</sub> O <sub>4</sub><br>TEM: 22 nm of grain sizes of Fe <sub>3</sub> O <sub>4</sub> present on NC-MA /L surface<br>Pore diameter: 15.2 nm<br>Pore volume: 0.71 cm <sup>3</sup> g <sup>-1</sup> | 85.3 m <sup>2</sup> g <sup>-1</sup> | - |  | As(V) | C <sub>0</sub> =10 mg L <sup>-1</sup><br>t <sub>e</sub> = 90 min | 0.1 - 20 mg L <sup>-1</sup> | T=25 °C<br>pH=6.6<br>dose=0.2 g L <sup>-1</sup> | Fe <sup>2+</sup> (1.0 mg L <sup>-1</sup> )      | Removal=97% As(III)<br>Removal=98% As(V)                                                                                                                                                            |                                                                                                                                                                 |                                                           |                                          |
|                                             |                                            |                                                                                                                                                                                                                     |                                     |   |  |       |                                                                  |                             | -                                               | T=25 °C<br>pH=6.6<br>dose=0.2 g L <sup>-1</sup> | Cl <sup>-</sup> (1.0 mmol L <sup>-1</sup> )<br>NO <sub>3</sub> <sup>-</sup> (1.0 mmol L <sup>-1</sup> )<br>SO <sub>4</sub> <sup>2-</sup> (1.0 mmol L <sup>-1</sup> )                                | Removal>95% As(III)<br>Removal>98% As(V)                                                                                                                        |                                                           |                                          |
|                                             |                                            |                                                                                                                                                                                                                     |                                     |   |  |       |                                                                  |                             |                                                 | -                                               | T=25 °C<br>pH=6.6<br>dose=0.2 g L <sup>-1</sup>                                                                                                                                                     | PO <sub>4</sub> <sup>3-</sup> (1.0 mmol L <sup>-1</sup> )                                                                                                       | Removal<85% As(III)<br>Removal<95% As(V)                  |                                          |
|                                             |                                            |                                                                                                                                                                                                                     |                                     |   |  |       |                                                                  |                             |                                                 |                                                 | -                                                                                                                                                                                                   | T=25 °C<br>pH=6.6<br>dose=0.2 g L <sup>-1</sup>                                                                                                                 | CO <sub>3</sub> <sup>2-</sup> (1.0 mmol L <sup>-1</sup> ) | Removal>95% As(III)<br>Removal<30% As(V) |
|                                             |                                            |                                                                                                                                                                                                                     |                                     |   |  |       |                                                                  |                             |                                                 |                                                 |                                                                                                                                                                                                     | <b>Pseudo-second order:</b><br>q <sub>e</sub> =1.0463 mg g <sup>-1</sup><br>k <sub>2</sub> =0.189 g mg <sup>-1</sup> min <sup>-1</sup><br>R <sup>2</sup> =0.997 |                                                           |                                          |
|                                             |                                            |                                                                                                                                                                                                                     |                                     |   |  | As(V) | C <sub>0</sub> =10 mg L <sup>-1</sup><br>t <sub>e</sub> = 90 min | 0.1 - 20 mg L <sup>-1</sup> | T=25 °C<br>pH=6<br>dose=0.1 g L <sup>-1</sup>   | -                                               | <b>Freundlich:</b><br>k <sub>F</sub> =0.2412 mol g <sup>-1</sup> (L mol <sup>-1</sup> ) <sup>1/n</sup><br>n=1.779<br>R <sup>2</sup> =0.995<br><b>Adsorption capacities:</b> 85.3 mg g <sup>-1</sup> |                                                                                                                                                                 |                                                           |                                          |
|                                             |                                            |                                                                                                                                                                                                                     |                                     |   |  |       |                                                                  |                             |                                                 |                                                 |                                                                                                                                                                                                     |                                                                                                                                                                 |                                                           |                                          |
| Fe <sub>3</sub> O <sub>4</sub>              | Reduction-precipitation method             | TEM: 25 nm spherical NPs                                                                                                                                                                                            | -                                   | - |  | As(V) | C <sub>0</sub> =13 mg L <sup>-1</sup><br>t <sub>e</sub> = 1 h    | -                           | T=25 °C<br>pH=2.5<br>dose=1 g L <sup>-1</sup>   | -                                               | <b>Pseudo-second order:</b><br>q <sub>e</sub> =5.94 mg g <sup>-1</sup>                                                                                                                              |                                                                                                                                                                 |                                                           |                                          |
|                                             |                                            |                                                                                                                                                                                                                     |                                     |   |  |       |                                                                  |                             |                                                 |                                                 |                                                                                                                                                                                                     |                                                                                                                                                                 |                                                           |                                          |

[93]

[94]

Produced  
from iron  
ore tailings

$k_2=0.039\text{ g mg}^{-1}\text{ min}^{-1}$   
 $R^2=0.99$   
**Langmuir:**  
 $q_m=9.72\text{ mg g}^{-1}$   
 $k_L=1.17\text{ L mg}^{-1}$   
 $R^2=0.996$   
**maximum adsorption capacity:**  
78.95 %  
9.72 mg/g  
Contact time=6 h  
**Pseudo-second order:**  
 $q_e=5.97\text{ mg g}^{-1}$   
 $k_2=0.070\text{ g mg}^{-1}\text{ min}^{-1}$   
 $R^2=0.99$   
**Langmuir:**  
 $q_m=9.79\text{ mg g}^{-1}$   
 $k_L=2.30\text{ L mg}^{-1}$   
 $R^2=0.999$   
**Maximum adsorption capacity:** 9.79 mg g<sup>-1</sup>  
Adsorption order of metals  
can be arranged as:  
 $\text{As}^{5+}>\text{Cu}^{2+}>\text{Zn}^{2+}>\text{Mn}^{2+}$   
Contact time=6 h

|       |                                                 |   |                                               |                                                                                                                                                                      |                       |
|-------|-------------------------------------------------|---|-----------------------------------------------|----------------------------------------------------------------------------------------------------------------------------------------------------------------------|-----------------------|
| As(V) | $C_0=13\text{ mg L}^{-1}$<br>$t_e=1\text{ h}$   | - | T=25 °C<br>pH=5.5<br>dose=2 g L <sup>-1</sup> | $\text{Cu}^{2+}$ (13 mg L <sup>-1</sup> )<br>$\text{Zn}^{2+}$ (13 mg L <sup>-1</sup> )<br>$\text{Mn}^{2+}$ (13 mg L <sup>-1</sup> )<br>Simultaneous<br>co-adsorption |                       |
| As(V) | $C_0=13.2\text{ mg L}^{-1}$<br>$t_e=1\text{ h}$ | - | T=25 °C<br>pH=2.5<br>dose=1 g L <sup>-1</sup> | $\text{Al}^{3+}$ (13 mg L <sup>-1</sup> )                                                                                                                            | Removal=72.37 % As(V) |
| As(V) | $C_0=13.4\text{ mg L}^{-1}$<br>$t_e=1\text{ h}$ | - | T=25 °C<br>pH=2.5<br>dose=1 g L <sup>-1</sup> | $\text{Al}^{3+}$ (103 mg L <sup>-1</sup> )                                                                                                                           | Removal=68.14 % As(V) |
| As(V) | $C_0=13.3\text{ mg L}^{-1}$<br>$t_e=1\text{ h}$ | - | T=25 °C<br>pH=2.5<br>dose=1 g L <sup>-1</sup> | $\text{Fe}^{3+}$ (13.4 mg L <sup>-1</sup> )                                                                                                                          | Removal=70.83 % As(V) |
| As(V) | $C_0=13.4\text{ mg L}^{-1}$<br>$t_e=1\text{ h}$ | - | T=25 °C<br>pH=2.5<br>dose=1 g L <sup>-1</sup> | $\text{Fe}^{3+}$ (104.5 mg L <sup>-1</sup> )                                                                                                                         | Removal=65.25 % As(V) |

Co-  
precipitation  
with sodium

XRD: 8 nm  
Pore radius: 5.5 nm  
Pore volume: 0.29  
cm<sup>3</sup> g<sup>-1</sup>

137.4  
m<sup>2</sup> g<sup>-1</sup>

65.8 emu g<sup>-1</sup>

As(III)  
Pb(II)  
Cd(II)

$C_0=20\text{ g L}^{-1}$   
 $t_e=20\text{ min}$

20–150 mg L<sup>-1</sup>

T=27 °C  
pH=5.5  
dose=5 g L<sup>-1</sup>

-

**Pseudo-second order:**  
 $q_e=0.43\text{ mg g}^{-1}\text{ As(III)}$   
 $k_2=1.56\text{ g mg}^{-1}\text{ min}^{-1}$   
 $R^2=0.9997$

|                                     |                                                                                                                                           |                                            |                                          |   |                  |                                                                                                    |   |                                               |  |                                                                                                                                                                                                                                                                                                                                                                                                                                                                                                                                                                                                                                                                                                                                                                                                                                                                                                                                                                                                                                                                       |
|-------------------------------------|-------------------------------------------------------------------------------------------------------------------------------------------|--------------------------------------------|------------------------------------------|---|------------------|----------------------------------------------------------------------------------------------------|---|-----------------------------------------------|--|-----------------------------------------------------------------------------------------------------------------------------------------------------------------------------------------------------------------------------------------------------------------------------------------------------------------------------------------------------------------------------------------------------------------------------------------------------------------------------------------------------------------------------------------------------------------------------------------------------------------------------------------------------------------------------------------------------------------------------------------------------------------------------------------------------------------------------------------------------------------------------------------------------------------------------------------------------------------------------------------------------------------------------------------------------------------------|
| Fe <sub>3</sub> O <sub>4</sub>      | hydroxide<br>using an<br>aqueous<br>extract<br>lemon peel<br>as surfactant<br>(green Fe <sub>3</sub> O <sub>4</sub><br>nanoparticle<br>s) |                                            |                                          |   | simultane<br>ous |                                                                                                    |   |                                               |  | q <sub>e</sub> =0.88 mg g <sup>-1</sup> Pb(II)<br>k <sub>2</sub> =2.24 g mg <sup>-1</sup> min <sup>-1</sup><br>R <sup>2</sup> =0.9999<br>q <sub>e</sub> =0.42 mg g <sup>-1</sup> Cd(II)<br>k <sub>2</sub> =0.54 g mg <sup>-1</sup> min <sup>-1</sup><br>R <sup>2</sup> =0.9923<br><b>Langmuir:</b><br>q <sub>m</sub> =25.91 mg g <sup>-1</sup> As(III)<br>k <sub>L</sub> =0.07 L mg <sup>-1</sup><br>R <sup>2</sup> =0.9905<br>q <sub>m</sub> =9.01 mg g <sup>-1</sup> Pb(II)<br>k <sub>L</sub> =0.01 L mg <sup>-1</sup><br>R <sup>2</sup> =0.9932<br>q <sub>m</sub> =25.84 mg g <sup>-1</sup> Cd(II)<br>k <sub>L</sub> =0.08 L mg <sup>-1</sup><br>R <sup>2</sup> =0.9949<br><b>Freundlich:</b><br>k <sub>F</sub> =0.24 L mg <sup>-1</sup> As(III)<br>n=3.31<br>R <sup>2</sup> =0.9861<br>k <sub>F</sub> =2.10 L mg <sup>-1</sup> Pb(II)<br>n=1.58<br>R <sup>2</sup> =0.988<br>k <sub>F</sub> =0.29 L mg <sup>-1</sup> Cd(II)<br>n=5.60<br>R <sup>2</sup> =0.8756<br><b>Adsorption capacities:</b><br>98.8 Pb(II)<br>46.0 Cd(II)<br>48.2 As(III)<br>Contact time=2 h |
|                                     |                                                                                                                                           |                                            |                                          |   |                  |                                                                                                    |   |                                               |  | Cl <sup>-</sup> (28.6 mg L <sup>-1</sup> )<br>NO <sub>3</sub> <sup>-</sup> (1.5 mg L <sup>-1</sup> )<br>PO <sub>4</sub> <sup>3-</sup> (3 mg L <sup>-1</sup> )<br>SO <sub>4</sub> <sup>2-</sup> (3.5 mg L <sup>-1</sup> )<br>Ca <sup>2+</sup> (49.1 mg L <sup>-1</sup> )<br>Mg <sup>2+</sup> (16.6 mg L <sup>-1</sup> )<br>Na <sup>+</sup> (105 mg L <sup>-1</sup> )<br>K <sup>+</sup> (1.04 mg L <sup>-1</sup> )                                                                                                                                                                                                                                                                                                                                                                                                                                                                                                                                                                                                                                                      |
|                                     |                                                                                                                                           |                                            |                                          |   |                  |                                                                                                    |   |                                               |  | C <sub>0</sub> (As(III))=129 g<br>L <sup>-1</sup><br>C <sub>0</sub> (Pb(II))= 0.9 g<br>L <sup>-1</sup><br>C <sub>0</sub> (Pb(II))= 0.9 g<br>L <sup>-1</sup><br>t <sub>e</sub> = 20 min                                                                                                                                                                                                                                                                                                                                                                                                                                                                                                                                                                                                                                                                                                                                                                                                                                                                                |
|                                     |                                                                                                                                           |                                            |                                          |   |                  |                                                                                                    |   |                                               |  | T=27 °C<br>pH=5.5<br>dose=5 g L <sup>-1</sup>                                                                                                                                                                                                                                                                                                                                                                                                                                                                                                                                                                                                                                                                                                                                                                                                                                                                                                                                                                                                                         |
|                                     |                                                                                                                                           |                                            |                                          |   |                  |                                                                                                    |   |                                               |  | Removal>95% As(III)<br>Removal<5% Pb(II)<br>Removal<2.5% Cd(II)                                                                                                                                                                                                                                                                                                                                                                                                                                                                                                                                                                                                                                                                                                                                                                                                                                                                                                                                                                                                       |
| Fe <sub>3</sub> O <sub>4</sub> /nOG | Obtained by<br>physical<br>exfoliation<br>method<br>using<br>thermal<br>treatment at                                                      | TEM: 5-9 nm Fe <sub>3</sub> O <sub>4</sub> | 189.94<br>m <sup>2</sup> g <sup>-1</sup> | - | As(III)<br>As(V) | C <sub>0</sub> (As(III))=1 mg<br>L <sup>-1</sup><br>C <sub>0</sub> (As(V))=1 mg<br>L <sup>-1</sup> | - | T=25 °C<br>pH=7<br>dose=0.1 g L <sup>-1</sup> |  | <b>Pseudo-second order:</b><br>q <sub>e</sub> =5.18 mg g <sup>-1</sup> As(III)<br>k <sub>2</sub> =0.0031 g mg <sup>-1</sup> min <sup>-1</sup><br>R <sup>2</sup> =0.998<br>q <sub>e</sub> =3.84 mg g <sup>-1</sup> As(V)<br>k <sub>2</sub> =0.0098 g mg <sup>-1</sup> min <sup>-1</sup><br>R <sup>2</sup> =0.999<br><b>Langmuir:</b>                                                                                                                                                                                                                                                                                                                                                                                                                                                                                                                                                                                                                                                                                                                                   |

600 °C for 1  
h

$q_m=24.6 \text{ mg g}^{-1} \text{ As(III)}$   
 $k_L=0.6 \text{ L mg}^{-1}$   
 $R^2=0.856$   
 $q_m=9.44 \text{ mg g}^{-1} \text{ As(V)}$   
 $k_L=0.78 \text{ L mg}^{-1}$   
 $R^2=0.767$   
**Freundlich:**  
 $k_F=7.49 \text{ mg g}^{-1} (\text{L mg}^{-1})^{1/n}$   
 $\text{As(III)}$   
 $n=3.45$   
 $R^2=0.974$   $k_F=3.82$   
 $\text{mg g}^{-1} (\text{L mg}^{-1})^{1/n} \text{ As(V)}$   
 $n=4.76$   
 $R^2=0.981$   
**Maximum adsorption capacity:**  
 $38 \text{ mg L}^{-1} \text{ As(III)}$   
 $14 \text{ mg L}^{-1} \text{ As(V)}$

As(III)  
As(V)  
 $C_0(\text{As(III)})=5 \text{ mg L}^{-1}$   
 $C_0(\text{As(V)})=5 \text{ mg L}^{-1}$   
 $t_e=24 \text{ h}$

-

$T=25 \text{ }^\circ\text{C}$   
 $\text{pH}=7$   
 $\text{dose}=0.1 \text{ g L}^{-1}$

-

**Adsorption capacities:**  $11.3 \text{ mg g}^{-1} \text{ As(III)}$   
 $5.5 \text{ mg g}^{-1} \text{ As(V)}$   
 control without competitive anion

As(III)  
As(V)  
 $C_0(\text{As(III)})=5 \text{ mg L}^{-1}$   
 $C_0(\text{As(V)})=5 \text{ mg L}^{-1}$   
 $t_e=24 \text{ h}$

-

$T=25 \text{ }^\circ\text{C}$   
 $\text{pH}=7$   
 $\text{dose}=0.1 \text{ g L}^{-1}$

$\text{Cl}^- (1 \text{ mmol L}^{-1})$   
 $\text{NO}_3^- (1 \text{ mmol L}^{-1})$   
 $\text{HCO}_3^- (1 \text{ mmol L}^{-1})$

Adsorption capacities  $<11 \text{ mg g}^{-1} \text{ As(III)}$   
 Adsorption capacities  $<5.5 \text{ mg g}^{-1} \text{ As(V)}$   
 $94\text{--}98\%$  compared to the control

As(III)  
As(V)  
 $C_0(\text{As(III)})=5 \text{ mg L}^{-1}$   
 $C_0(\text{As(V)})=5 \text{ mg L}^{-1}$   
 $t_e=24 \text{ h}$

-

$T=27 \text{ }^\circ\text{C}$   
 $\text{pH}=7$   
 $\text{dose}=0.1 \text{ g L}^{-1}$

$\text{SO}_4^{2-} (1 \text{ mmol L}^{-1})$

Adsorption capacities  $<8 \text{ mg g}^{-1} \text{ As(III)}$   
 Adsorption capacities  $<4 \text{ mg g}^{-1} \text{ As(V)}$   
 $65\text{--}72\%$  compared to the control

As(III)  
As(V)  
 $C_0(\text{As(III)})=5 \text{ mg L}^{-1}$   
 $C_0(\text{As(V)})=5 \text{ mg L}^{-1}$   
 $t_e=24 \text{ h}$

-

$T=25 \text{ }^\circ\text{C}$   
 $\text{pH}=7$   
 $\text{dose}=0.1 \text{ g L}^{-1}$

$\text{PO}_4^{3-} (1 \text{ mmol L}^{-1})$

Adsorption capacities  $<3.8 \text{ mg g}^{-1} \text{ As(III)}$   
 Adsorption capacities  $<3 \text{ mg g}^{-1} \text{ As(V)}$   
 $31\% \text{ As(III)}$   
 $52\% \text{ As(V)}$   
 compared to the control



[illegible]

|       |                                                   |   |                                                                                      |                                                        |                                                 |
|-------|---------------------------------------------------|---|--------------------------------------------------------------------------------------|--------------------------------------------------------|-------------------------------------------------|
| As(V) | $C_0=5 \text{ mg L}^{-1}$<br>$t_e=90 \text{ min}$ | - | $T=30 \text{ }^\circ\text{C}$<br>$\text{pH}=4$<br>$\text{dose}=0.6 \text{ g L}^{-1}$ | $\text{Cl}^-$<br>$\text{NO}_3^-$<br>$\text{SO}_4^{2-}$ | Adsorption capacities= $7.95 \text{ mg g}^{-1}$ |
| As(V) | $C_0=5 \text{ mg L}^{-1}$<br>$t_e=90 \text{ min}$ | - | $T=30 \text{ }^\circ\text{C}$<br>$\text{pH}=4$<br>$\text{dose}=0.6 \text{ g L}^{-1}$ | $\text{PO}_4^{3-}$                                     | Adsorption capacities $< 5 \text{ mg g}^{-1}$   |

**Table S3.** Lead, other metals, and pollutants adsorption parameters for magnetic nanohybrids.

| Adsorbent                                          | Synthesis method | Size and shape             | Surface area                            | Saturation magnetization  | Adsorbates | Initial concentration (C <sub>0</sub> ) and equilibrium time (t <sub>e</sub> ) | Concentration range in isotherm experiments | Adsorption conditions                          | Kinetic and isothermal parameters                                | Ref. |  |  |  |  |
|----------------------------------------------------|------------------|----------------------------|-----------------------------------------|---------------------------|------------|--------------------------------------------------------------------------------|---------------------------------------------|------------------------------------------------|------------------------------------------------------------------|------|--|--|--|--|
| γ-Fe <sub>2</sub> O <sub>3</sub> -1                | Co-precipitation | XRD: 6.4 nm                | 77.5-214 m <sup>2</sup> g <sup>-1</sup> | 12-62 emu g <sup>-1</sup> | Pb(II)     | C <sub>0</sub> =50 mg L <sup>-1</sup> t <sub>e</sub> =7 h                      | 0-50 mg L <sup>-1</sup>                     | T=25 °C<br>pH=7<br>dose=0.56 g L <sup>-1</sup> | <b>Langmuir:</b><br>q <sub>m</sub> =57.3-88.2 mg g <sup>-1</sup> | [43] |  |  |  |  |
| γ-Fe <sub>2</sub> O <sub>3</sub> -2                |                  | XRD: 7.1 nm                |                                         |                           |            |                                                                                |                                             |                                                |                                                                  |      |  |  |  |  |
| γ-Fe <sub>2</sub> O <sub>3</sub> @SiO <sub>2</sub> |                  | XRD: 10 nm                 |                                         |                           |            |                                                                                |                                             |                                                |                                                                  |      |  |  |  |  |
| γ-Fe <sub>2</sub> O <sub>3</sub> -SBA15            |                  | XRD: 6.2 nm                |                                         |                           |            |                                                                                |                                             |                                                |                                                                  |      |  |  |  |  |
| γ-Fe <sub>2</sub> O <sub>3</sub> @OA               |                  | TEM: 4-10nm<br>XRD: 5.9 nm |                                         |                           |            |                                                                                |                                             |                                                |                                                                  |      |  |  |  |  |
| γ-Fe <sub>2</sub> O <sub>3</sub> @LA               |                  | XRD: 4.5 nm                |                                         |                           |            |                                                                                |                                             |                                                |                                                                  |      |  |  |  |  |
| γ-Fe <sub>2</sub> O <sub>3</sub> @L-arg            |                  | XRD: 5.9 nm                |                                         |                           | Cu(II)     | C <sub>0</sub> =40 mg L <sup>-1</sup> t <sub>e</sub> =7 h                      |                                             |                                                |                                                                  |      |  |  |  |  |
| γ-Fe <sub>2</sub> O <sub>3</sub> @HAp              |                  | XRD: 8.0 nm                |                                         |                           |            |                                                                                |                                             |                                                |                                                                  |      |  |  |  |  |
| γ-Fe <sub>2</sub> O <sub>3</sub> -EDTA1            |                  | XRD: 3.0 nm                |                                         |                           |            |                                                                                |                                             |                                                |                                                                  |      |  |  |  |  |
| γ-Fe <sub>2</sub> O <sub>3</sub> @MWCNTs           |                  | XRD: 7.3 nm                |                                         |                           |            |                                                                                |                                             |                                                |                                                                  |      |  |  |  |  |

|                                            |                  |                                                         |                                     |                               |        |                                                                  |                          |                                                                    |                                                                                                                                                                                                                                                                                                                                        |       |
|--------------------------------------------|------------------|---------------------------------------------------------|-------------------------------------|-------------------------------|--------|------------------------------------------------------------------|--------------------------|--------------------------------------------------------------------|----------------------------------------------------------------------------------------------------------------------------------------------------------------------------------------------------------------------------------------------------------------------------------------------------------------------------------------|-------|
| Fe <sub>3</sub> O <sub>4</sub>             | Co-precipitation | TEM: 8-13 nm-spherical                                  | -                                   | -                             | Pb(II) | C <sub>0</sub> =50 mg L <sup>-1</sup> t <sub>e</sub> =25 min     | 10-50 mg L <sup>-1</sup> | T=25 °C<br>pH=5.0<br>dose=0.02 g L <sup>-1</sup>                   | <b>Pseudo- First order:</b><br>k <sub>1</sub> =0.053 g mg <sup>-1</sup> h <sup>-1</sup><br>R <sup>2</sup> =0.0184<br><b>Pseudo Second order:</b><br>k <sub>2</sub> =0.05 g mg <sup>-1</sup> h <sup>-1</sup><br>R <sup>2</sup> =0.99387                                                                                                 | [106] |
| γ – Fe <sub>2</sub> O <sub>3</sub> – EDTA1 | Co-precipitation | TEM: 4 nm γ – Fe <sub>2</sub> O <sub>3</sub> – EDTA1    | 272 m <sup>2</sup> g <sup>-1</sup>  | 16.3 emu g <sup>-1</sup>      | Pb(II) | C <sub>0</sub> =50 mg L <sup>-1</sup> t <sub>e</sub> =7 h        | 0–50 mg L <sup>-1</sup>  | T=70 °C, 80 °C<br>pH=5.5<br>dose=0.5 g L <sup>-1</sup>             | -                                                                                                                                                                                                                                                                                                                                      | [30]  |
| γ – Fe <sub>2</sub> O <sub>3</sub> – EDTA2 |                  | TEM: ~7.6 nm γ – Fe <sub>2</sub> O <sub>3</sub> – EDTA2 |                                     |                               |        |                                                                  |                          |                                                                    |                                                                                                                                                                                                                                                                                                                                        |       |
| γ – Fe <sub>2</sub> O <sub>3</sub> – EDTA3 |                  | TEM: ~7 nm γ – Fe <sub>2</sub> O <sub>3</sub> – EDTA2   |                                     |                               |        |                                                                  |                          |                                                                    |                                                                                                                                                                                                                                                                                                                                        |       |
| Fe <sub>3</sub> O <sub>4</sub>             | Co-precipitation | TEM: 8-13 nm                                            | 12.7 m <sup>2</sup> g <sup>-1</sup> | 65.3-75.8 emu g <sup>-1</sup> | Pb(II) | C <sub>0</sub> =25,50,100 mg L <sup>-1</sup> t <sub>e</sub> =3 h | -                        | T=25 °C,<br>35 °C, 45 °C,<br>pH=5.0<br>dose=0.2 g L <sup>-1</sup>  | <b>Langmuir:</b><br>q <sub>m</sub> =52.9 mg g <sup>-1</sup> (25 °C)<br>q <sub>m</sub> =52.8 mg g <sup>-1</sup> (35 °C)<br>q <sub>m</sub> =53.2 mg g <sup>-1</sup> (45 °C)<br>R <sup>2</sup> =0.955-0.981                                                                                                                               | [107] |
|                                            |                  |                                                         |                                     |                               | Cr(II) |                                                                  |                          | T=25 °C,<br>35 °C, 45 °C,<br>pH=2.0,<br>dose=0.1 g L <sup>-1</sup> | <b>Langmuir:</b><br>q <sub>m</sub> =20.2 mg g <sup>-1</sup> (25 °C)<br>q <sub>m</sub> =26.8 mg g <sup>-1</sup> (35 °C)<br>q <sub>m</sub> =34.9 mg g <sup>-1</sup> (45 °C)                                                                                                                                                              |       |
|                                            |                  |                                                         |                                     |                               |        |                                                                  |                          |                                                                    | <b>Langmuir:</b><br>q <sub>m</sub> =473.9 mg g <sup>-1</sup> (40 °C)<br>R <sup>2</sup> =0.993 (40 °C)<br>k <sub>L</sub> =0.0011 L mg <sup>-1</sup> (40 °C)<br>q <sub>m</sub> =555.5 mg g <sup>-1</sup> (50 °C)<br>R <sup>2</sup> =0.998 (50 °C)<br>k <sub>L</sub> =0.0016 L mg <sup>-1</sup> (50 °C)                                   |       |
| GFMNPECABs                                 | Co-precipitation | -                                                       | -                                   | 1.7 emu g <sup>-1</sup>       | Pb(II) | C <sub>0</sub> =10-80 mg L <sup>-1</sup> t <sub>e</sub> =100 min | 10-80 mg L <sup>-1</sup> | T=40 °C,<br>50 °C, 60 °C,<br>pH=6.0,<br>dose=10 g L <sup>-1</sup>  | q <sub>m</sub> =555.5 mg g <sup>-1</sup> (60 °C)<br>R <sup>2</sup> =0.998 (60 °C)<br>k <sub>L</sub> =0.0016 L mg <sup>-1</sup> (60 °C)<br><b>Freundlich:</b><br>k <sub>F</sub> =2.139 L mg <sup>-1</sup> (40 °C)<br>R <sup>2</sup> =0.953 (40 °C)<br>k <sub>F</sub> =2.280 L mg <sup>-1</sup> (50 °C)<br>R <sup>2</sup> =0.968 (50 °C) | [108] |

|                                                 |                  |             |   |                        |        |                                              |                           |                                                                          |                                                                                                                                                                          |
|-------------------------------------------------|------------------|-------------|---|------------------------|--------|----------------------------------------------|---------------------------|--------------------------------------------------------------------------|--------------------------------------------------------------------------------------------------------------------------------------------------------------------------|
|                                                 |                  |             |   |                        |        |                                              |                           |                                                                          | $k_F=2.917 \text{ L mg}^{-1}$ (60 °C)<br>$R^2=0.973$ (60 °C)                                                                                                             |
|                                                 |                  |             |   |                        |        |                                              |                           |                                                                          | <b>Temkin:</b><br>$K_t=5.150 \text{ L mg}^{-1}$ (40 °C)<br>$R^2=0.919$ (40 °C)                                                                                           |
|                                                 |                  |             |   |                        |        |                                              |                           |                                                                          | $K_i=5.340 \text{ L m}^{-1} \text{ g}^{-1}$ (50 °C)<br>$R^2=0.940$ (50 °C)                                                                                               |
|                                                 |                  |             |   |                        |        |                                              |                           |                                                                          | $K_i=10.39 \text{ L mg}^{-1}$ (60 °C)<br>$R^2=0.940$ (60 °C)                                                                                                             |
|                                                 |                  |             |   |                        |        |                                              |                           | T=25 °C,<br>35 °C, 45 °C,<br><br>pH=6.0,<br>dose=2.0 g L <sup>-1</sup>   | <b>Langmuir:</b><br>$q_e=18.8 \text{ mg g}^{-1}$<br>$q_m=7.00 \text{ mg g}^{-1}$ (25 °C)<br>$q_m=11.6 \text{ mg g}^{-1}$ (35 °C)<br>$q_m=18.8 \text{ mg g}^{-1}$ (45 °C) |
| L-Cyst-Fe <sub>3</sub> O <sub>4</sub>           | Co-precipitation | XRD: 15 nm  | - | -                      | Cr(VI) | $C_0=50 \text{ mg L}^{-1}$ $t_e=1 \text{ h}$ | 10-100 mg L <sup>-1</sup> | T=25 °C,,<br>35 °C, 45 °C,<br><br>dose=2.0 g L <sup>-1</sup> ,<br>pH=2.0 | <b>Langmuir:</b><br>$q_e=34.5 \text{ mg g}^{-1}$<br>$q_m=11.6 \text{ mg g}^{-1}$ (25 °C)<br>$q_m=23.5 \text{ mg g}^{-1}$ (35 °C)<br>$q_m=34.5 \text{ mg g}^{-1}$ (45 °C) |
|                                                 |                  |             |   |                        | Pb(II) |                                              |                           | T=25 °C,<br>35 °C, 45 °C,<br><br>pH=6.0,<br>dose=2.0 g L <sup>-1</sup>   | <b>Freundlich:</b><br>$k_F=19.16 \text{ mg g}^{-1}$ (25 °C)<br>$k_F=23.88 \text{ mg g}^{-1}$ (35 °C)<br>$k_F=31.19 \text{ mg g}^{-1}$ (45 °C)                            |
|                                                 |                  |             |   |                        | Cr(VI) |                                              |                           | T=25 °C,<br>35 °C, 45 °C,<br>pH=2.0,<br>dose=2.0 g L <sup>-1</sup>       | <b>Freundlich:</b><br>$k_F=25.98 \text{ mg g}^{-1}$ (25 °C)<br>$k_F=30.27 \text{ mg g}^{-1}$ (35 °C)<br>$k_F=41.05 \text{ mg g}^{-1}$ (45 °C)                            |
|                                                 |                  |             |   |                        | Pb(II) |                                              |                           |                                                                          | <b>Langmuir:</b><br>$q_m=257 \text{ mg g}^{-1}$                                                                                                                          |
| Fe <sub>3</sub> O <sub>4</sub> -NH <sub>2</sub> | Solvent thermal  | TEM: 100 nm | - | 80 emu g <sup>-1</sup> |        | $C_0=25, 35, 45 \text{ mg L}^{-1}$           | 30-300 mg L <sup>-1</sup> | T=25 °C,<br>35 °C, 45 °C,<br>pH=5.5                                      |                                                                                                                                                                          |
|                                                 |                  |             |   |                        | Cd(II) |                                              |                           |                                                                          | <b>Langmuir:</b><br>$q_m=129.5 \text{ mg g}^{-1}$                                                                                                                        |

[109]

[110]

|                                     |   |                 |   |                             |                                                              |        |                         |                                                                    |                                                                                                                                                                                                                                                |       |
|-------------------------------------|---|-----------------|---|-----------------------------|--------------------------------------------------------------|--------|-------------------------|--------------------------------------------------------------------|------------------------------------------------------------------------------------------------------------------------------------------------------------------------------------------------------------------------------------------------|-------|
| Fe <sub>3</sub> O <sub>4</sub>      | - | TEM: 260 nm     | - | 69.4<br>emu g <sup>-1</sup> | C <sub>0</sub> =10 mg L <sup>-1</sup><br>t <sub>e</sub> =3 h | Pb(II) | 0-80 mg L <sup>-1</sup> | T=25 °C,<br>40 °C, 55 °C,<br>pH=5.0,<br>dose=0.2 g L <sup>-1</sup> | <b>Langmuir:</b><br>q <sub>e</sub> =41.04 mg g <sup>-1</sup> (25 °C)<br>q <sub>e</sub> =46.69 mg g <sup>-1</sup> (40 °C)<br>q <sub>e</sub> = 55.84 mg g <sup>-1</sup> (55 °C)                                                                  | [111] |
|                                     |   |                 |   |                             |                                                              |        |                         |                                                                    | <b>Freundlich:</b><br>k <sub>F</sub> =18.28 mL <sup>1/n</sup> μg <sup>1-1/n</sup><br>(25 °C) k <sub>F</sub> =19.44<br>mL <sup>1/n</sup> μg <sup>1-1/n</sup> (40 °C)<br>k <sub>F</sub> =20.58 mL <sup>1/n</sup> μg <sup>1-1/n</sup><br>(55 °C)  |       |
|                                     |   |                 |   |                             |                                                              | Cu(II) | 0-70 mg L <sup>-1</sup> | T=25 °C,<br>40 °C, 55 °C,<br>pH=6.0,<br>dose=0.2 g L <sup>-1</sup> | <b>Langmuir:</b><br>q <sub>e</sub> =21.14 mg g <sup>-1</sup> (25 °C)<br>q <sub>e</sub> =31.92 mg g <sup>-1</sup> (40 °C)<br>q <sub>e</sub> =42.85 mg g <sup>-1</sup> (55 °C)                                                                   |       |
|                                     |   |                 |   |                             |                                                              |        |                         |                                                                    | <b>Freundlich:</b><br>k <sub>F</sub> =2.32 mL <sup>1/n</sup> μg <sup>1-1/n</sup> (25 °C)<br>k <sub>F</sub> =3.65 mL <sup>1/n</sup> μg <sup>1-1/n</sup> (40 °C)<br>k <sub>F</sub> =4.16 mL <sup>1/n</sup> μg <sup>1-1/n</sup> (55 °C)           |       |
| Fe <sub>3</sub> O <sub>4</sub> @PDA | - | TEM: 260-300 nm | - | 49 emu<br>g <sup>-1</sup>   | C <sub>0</sub> =10 mg L <sup>-1</sup> t <sub>e</sub> =3<br>h | Pb(II) | 0-70 mg L <sup>-1</sup> | T=25 °C,<br>40 °C, 55 °C,<br>pH=5.0,<br>dose=0.2 g L <sup>-1</sup> | <b>Langmuir:</b><br>q =57.25 mg g <sup>-1</sup> (25 °C)<br>q <sub>e</sub> =71.08 mg g <sup>-1</sup> (40 °C)<br>q <sub>e</sub> =101.96 mg g <sup>-1</sup> (55 °C)                                                                               | [111] |
|                                     |   |                 |   |                             |                                                              |        |                         |                                                                    | <b>Freundlich:</b><br>k <sub>F</sub> =28.43 mL <sup>1/n</sup> μg <sup>1-1/n</sup><br>(25 °C) k <sub>F</sub> =36.19 mL <sup>1/n</sup> μg <sup>1-1/n</sup><br>(40 °C) k <sub>F</sub> =41.96 mL <sup>1/n</sup><br>μg <sup>1-1/n</sup> (55 °C)     |       |
|                                     |   |                 |   |                             |                                                              | Cu(II) | 0-70 mg L <sup>-1</sup> | T=25 °C,<br>40 °C, 55 °C,<br>pH=6.0,<br>dose=0.2 g L <sup>-1</sup> | <b>Langmuir:</b><br>q <sub>e</sub> =86.35 mg g <sup>-1</sup> (25 °C)<br>q <sub>e</sub> =104.81 mg g <sup>-1</sup> (40 °C)<br>q <sub>e</sub> =112.48 mg g <sup>-1</sup> (55 °C)                                                                 |       |
|                                     |   |                 |   |                             |                                                              |        |                         |                                                                    | <b>Freundlich:</b><br>k <sub>F</sub> = 22.35 mL <sup>1/n</sup> μg <sup>1-1/n</sup><br>(25 °C)<br>k <sub>F</sub> =24.73 mL <sup>1/n</sup> μg <sup>1-1/n</sup><br>(40 °C) k <sub>F</sub> =30.88 mL <sup>1/n</sup> μg <sup>1-1/n</sup><br>(55 °C) |       |

|                                          |                                   |                                                   |                                     |                          |                  |                                                                   |                              |                                                   |                                                                                                                                                                                                                                                                                                                                                                                                                                                                                                                                                                                                                                                                                                                                                                                                                                                                                                                                                                                                                                                                                                                                                                                                                                                                                                                                                                                                                                                                                                                                                                                                                                                                                                                                                                                         |       |
|------------------------------------------|-----------------------------------|---------------------------------------------------|-------------------------------------|--------------------------|------------------|-------------------------------------------------------------------|------------------------------|---------------------------------------------------|-----------------------------------------------------------------------------------------------------------------------------------------------------------------------------------------------------------------------------------------------------------------------------------------------------------------------------------------------------------------------------------------------------------------------------------------------------------------------------------------------------------------------------------------------------------------------------------------------------------------------------------------------------------------------------------------------------------------------------------------------------------------------------------------------------------------------------------------------------------------------------------------------------------------------------------------------------------------------------------------------------------------------------------------------------------------------------------------------------------------------------------------------------------------------------------------------------------------------------------------------------------------------------------------------------------------------------------------------------------------------------------------------------------------------------------------------------------------------------------------------------------------------------------------------------------------------------------------------------------------------------------------------------------------------------------------------------------------------------------------------------------------------------------------|-------|
| Fe <sub>3</sub> O <sub>4</sub>           | -                                 | -                                                 | -                                   | -                        | Pb(II)<br>Cd(II) | C <sub>0</sub> =100 mg L <sup>-1</sup><br>t <sub>e</sub> =20 min  | 50-200 mg L <sup>-1</sup>    | T=25 °C,<br>pH=5.5,<br>dose=5.0 g L <sup>-1</sup> | <b>Langmuir:</b><br>q <sub>m</sub> =13.88 mg g <sup>-1</sup> Pb(II)<br>q <sub>m</sub> =9.52 mg g <sup>-1</sup> Cd(II)<br><b>Freundlich</b><br>k <sub>F</sub> =2.99 L g <sup>-1</sup> Pb(II)<br>k <sub>F</sub> =3.46 L g <sup>-1</sup> Cd(II)<br><b>Dubinbin–Radushkevich:</b><br>q <sub>mDR</sub> =12.88 mg g <sup>-1</sup> Pb(II)<br>q <sub>mDR</sub> =10.07 mg g <sup>-1</sup> Cd(II)<br><b>Pseudo- First order:</b><br>q <sub>e</sub> =3.45 mg g <sup>-1</sup> Pb(II)<br>k <sub>1</sub> =0.274 g mg <sup>-1</sup> h <sup>-1</sup><br>q <sub>e</sub> =6.48 mg g <sup>-1</sup> Cd(II)<br>k <sub>1</sub> =0.213 g mg <sup>-1</sup> h <sup>-1</sup><br><br><b>Pseudo Second order:</b><br>q <sub>e</sub> =11.11 mg g <sup>-1</sup> Pb(II)<br>k <sub>2</sub> =0.090 g mg <sup>-1</sup> h <sup>-1</sup><br>q <sub>e</sub> =10.6 mg g <sup>-1</sup> Cd(II)<br>k <sub>2</sub> =0.214 g mg <sup>-1</sup> h <sup>-1</sup><br><br><b>Pseudo second order:</b><br>q <sub>e</sub> = 28.98 mg g <sup>-1</sup><br>k <sub>2</sub> = 0.047 g mg <sup>-1</sup> min <sup>-1</sup><br>R <sup>2</sup> =0.9985<br><b>Langmuir:</b><br>q <sub>m</sub> = 21.05 mg g <sup>-1</sup><br>k <sub>L</sub> = 0.675 L mg <sup>-1</sup><br>R <sup>2</sup> = 0.9729<br><b>Freundlich:</b><br>k <sub>F</sub> = 28.98<br>n=7.25<br>R <sup>2</sup> = 0.9911<br><b>Experimental:</b><br>q <sub>e, exp</sub> = 39.7 mg g <sup>-1</sup><br><b>Pseudo Second order:</b><br>q <sub>e</sub> = 40.0 mg g <sup>-1</sup><br>k <sub>2</sub> = 0.0009 g mg <sup>-1</sup> h <sup>-1</sup><br>R <sup>2</sup> =0.924<br><b>Langmuir:</b><br>q <sub>m</sub> = 73.1 mg g <sup>-1</sup><br>k <sub>L</sub> = 0.021 L mg <sup>-1</sup><br>R <sup>2</sup> =0.98<br><b>Freundlich:</b><br>k <sub>F</sub> =3.6<br>n=1.7<br>R <sup>2</sup> =0.97 | [112] |
| Fe <sub>3</sub> O <sub>4</sub> -ETT      | Via epoxide ring opening reaction | FESEM: 25-52 nm<br>TEM: spherical, mesoporous NPs | 84.8 m <sup>2</sup> g <sup>-1</sup> | 30.7 emu g <sup>-1</sup> | Pb(II)           | C <sub>0</sub> =50 mg L <sup>-1</sup><br>t <sub>e</sub> =20 min   | -                            | T=19.85 °C,<br>pH=5,<br>dose=5 g L <sup>-1</sup>  | <b>Langmuir:</b><br>q <sub>m</sub> = 21.05 mg g <sup>-1</sup><br>k <sub>L</sub> = 0.675 L mg <sup>-1</sup><br>R <sup>2</sup> = 0.9729<br><b>Freundlich:</b><br>k <sub>F</sub> = 28.98<br>n=7.25<br>R <sup>2</sup> = 0.9911<br><b>Experimental:</b><br>q <sub>e, exp</sub> = 39.7 mg g <sup>-1</sup><br><b>Pseudo Second order:</b><br>q <sub>e</sub> = 40.0 mg g <sup>-1</sup><br>k <sub>2</sub> = 0.0009 g mg <sup>-1</sup> h <sup>-1</sup><br>R <sup>2</sup> =0.924<br><b>Langmuir:</b><br>q <sub>m</sub> = 73.1 mg g <sup>-1</sup><br>k <sub>L</sub> = 0.021 L mg <sup>-1</sup><br>R <sup>2</sup> =0.98<br><b>Freundlich:</b><br>k <sub>F</sub> =3.6<br>n=1.7<br>R <sup>2</sup> =0.97                                                                                                                                                                                                                                                                                                                                                                                                                                                                                                                                                                                                                                                                                                                                                                                                                                                                                                                                                                                                                                                                                                | [113] |
| Fe <sub>3</sub> O <sub>4</sub> -PEI/β-CD | solvothetmal method               | TEM: spherical particle                           | 17.5 m <sup>2</sup> g <sup>-1</sup> | 60.3 emu g <sup>-1</sup> | Pb(II)           | C <sub>0</sub> =100 mg L <sup>-1</sup><br>t <sub>e</sub> =200 min | 10 to 100 mg L <sup>-1</sup> | T=30 °C<br>pH=6<br>dose=0.5 g L <sup>-1</sup>     | <b>Langmuir:</b><br>q <sub>m</sub> = 73.1 mg g <sup>-1</sup><br>k <sub>L</sub> = 0.021 L mg <sup>-1</sup><br>R <sup>2</sup> =0.98<br><b>Freundlich:</b><br>k <sub>F</sub> =3.6<br>n=1.7<br>R <sup>2</sup> =0.97                                                                                                                                                                                                                                                                                                                                                                                                                                                                                                                                                                                                                                                                                                                                                                                                                                                                                                                                                                                                                                                                                                                                                                                                                                                                                                                                                                                                                                                                                                                                                                         | [114] |

|                                                                  |                                                                        |                                              |   |                             |                              |                                                                                         |                                                    |                                               |                                                                                                                                                                                                                                                                                                                                                                                                                                                                                                                                                                                                                                                                                                                                                                                                                                                                                                                                          |       |
|------------------------------------------------------------------|------------------------------------------------------------------------|----------------------------------------------|---|-----------------------------|------------------------------|-----------------------------------------------------------------------------------------|----------------------------------------------------|-----------------------------------------------|------------------------------------------------------------------------------------------------------------------------------------------------------------------------------------------------------------------------------------------------------------------------------------------------------------------------------------------------------------------------------------------------------------------------------------------------------------------------------------------------------------------------------------------------------------------------------------------------------------------------------------------------------------------------------------------------------------------------------------------------------------------------------------------------------------------------------------------------------------------------------------------------------------------------------------------|-------|
| Fe <sub>3</sub> O <sub>4</sub> @SiO <sub>2</sub> @PEI-NTDA       | Fe <sub>3</sub> O <sub>4</sub><br>(Solvothermal method)                | TEM: 200 -300 nm<br>SEM: spherical particles | - | 21.6<br>emu g <sup>-1</sup> | methyl orange (MO)           | C <sub>0</sub> =100 mg L <sup>-1</sup><br>t <sub>e</sub> =100 min                       | 25-200 mg L <sup>-1</sup>                          | T=30 °C<br>pH=3<br>dose=0.5 g L <sup>-1</sup> | <b>Pseudo Second order:</b><br>q <sub>e</sub> =131.1 mg g <sup>-1</sup><br>k <sub>2</sub> =0.0018 g mg <sup>-1</sup> h <sup>-1</sup><br>R <sup>2</sup> =0.977<br><b>Langmuir:</b><br>q <sub>m</sub> =192.2 mg g <sup>-1</sup><br>k <sub>L</sub> =0.178 L mg <sup>-1</sup><br>R <sup>2</sup> =0.97                                                                                                                                                                                                                                                                                                                                                                                                                                                                                                                                                                                                                                        | [115] |
|                                                                  |                                                                        |                                              |   |                             | methyl orange (MO)<br>Pb(II) | C <sub>0</sub> (MO)=100 mg L <sup>-1</sup><br>C <sub>0</sub> (Pb)=50 mg L <sup>-1</sup> | Pb(II) 10-50<br>MO 30 and 60<br>mg L <sup>-1</sup> | T=30 °C<br>pH=6                               | MO removal<br>efficiencies=95.4 %<br>Pb(II) removal<br>efficiencies=82.9 %<br>Maximum adsorption<br>capacity Pb(II)=285.3 mg g <sup>-1</sup><br>Maximum adsorption<br>capacity Cd(II)=48.2 mg g <sup>-1</sup><br><b>Pseudo-second order:</b><br>q <sub>e</sub> =277.7 mg g <sup>-1</sup><br>k <sub>2</sub> =0.00360 g mg <sup>-1</sup> min <sup>-1</sup><br>R <sup>2</sup> =0.996<br><b>Langmuir:</b><br>q <sub>m</sub> =286.9 mg g <sup>-1</sup><br>k <sub>L</sub> =0.0786 L mg <sup>-1</sup><br>R <sup>2</sup> =0.999<br><b>Freundlich:</b><br>k <sub>F</sub> =74.77 mg g <sup>-1</sup><br>n=4.20<br>R <sup>2</sup> =0.756<br><b>Pseudo-second order:</b><br>q <sub>e</sub> =103.47 mg g <sup>-1</sup><br>k <sub>2</sub> =0.0068 g mg <sup>-1</sup> min <sup>-1</sup><br>R <sup>2</sup> =0.9996<br><b>Langmuir:</b><br>q <sub>m</sub> =189.36 mg g <sup>-1</sup><br>k <sub>L</sub> =0.0059 L mg <sup>-1</sup><br>R <sup>2</sup> =0.998 |       |
| Fe <sub>3</sub> O <sub>4</sub> -g- C <sub>3</sub> N <sub>4</sub> | Ultrasonic method<br>Fe <sub>3</sub> O <sub>4</sub><br>(precipitation) | SEM: 500 nm-2µm<br>lamellar structure        | - | 8.4 emu<br>g <sup>-1</sup>  | Pb(II)                       | C <sub>0</sub> =200 mg L <sup>-1</sup><br>t <sub>e</sub> =20 min                        | 40-240 mg L <sup>-1</sup>                          | T=25 °C<br>pH=6<br>dose=1 g L <sup>-1</sup>   |                                                                                                                                                                                                                                                                                                                                                                                                                                                                                                                                                                                                                                                                                                                                                                                                                                                                                                                                          | [116] |

|                                                                                      |                                                      |                                                                        |                                                                            |                                                                            |                                               |                                                                                                       |                         |                                             |                                                                                                                                                                                                                                                                                                                                                                                                                                                                                                                                                                                                                                       |       |
|--------------------------------------------------------------------------------------|------------------------------------------------------|------------------------------------------------------------------------|----------------------------------------------------------------------------|----------------------------------------------------------------------------|-----------------------------------------------|-------------------------------------------------------------------------------------------------------|-------------------------|---------------------------------------------|---------------------------------------------------------------------------------------------------------------------------------------------------------------------------------------------------------------------------------------------------------------------------------------------------------------------------------------------------------------------------------------------------------------------------------------------------------------------------------------------------------------------------------------------------------------------------------------------------------------------------------------|-------|
| Fe <sub>3</sub> O <sub>4</sub> -SO <sub>3</sub> H                                    | The modified Stöber sol-gel process                  | SEM: 80 nm                                                             | 18.3 m <sup>2</sup> g <sup>-1</sup>                                        | 69 emu g <sup>-1</sup>                                                     | Pb(II)                                        | C <sub>0</sub> =10 mg L <sup>-1</sup><br>t <sub>c</sub> =12 h                                         | -                       | pH=7<br>dose=1 g L <sup>-1</sup>            | <b>Freundlich:</b><br>k <sub>F</sub> =3.66 mg g <sup>-1</sup><br>n=1.57<br>R <sup>2</sup> = 0.982<br>maximum adsorption capacity: 80.9 mg g <sup>-1</sup><br><b>Pseudo-second order:</b><br>q <sub>e</sub> =9.69 mg g <sup>-1</sup><br>K <sub>2</sub> =0.095 g mg <sup>-1</sup> min <sup>-1</sup><br>R <sup>2</sup> =1<br><b>Langmuir:</b><br>q <sub>m</sub> =108.93 mg g <sup>-1</sup><br>k <sub>L</sub> = 0.373 L mg <sup>-1</sup><br>R <sup>2</sup> =0.998<br>Adsorption capacities:166.1 mg g <sup>-1</sup>                                                                                                                       | [117] |
| Fe <sub>3</sub> O <sub>4</sub> @APS<br>Fe <sub>3</sub> O <sub>4</sub> @ APS@AA-co-CA | Coprecipitation method                               | TEM: 15-20 nm                                                          | -                                                                          | 79 emu g <sup>-1</sup><br>67 emu g <sup>-1</sup><br>52 emu g <sup>-1</sup> | Pb(II)                                        | C <sub>0</sub> =100 mg L <sup>-1</sup><br>t <sub>c</sub> =45 min                                      | -                       | pH=5.5<br>dose=0.05 g L <sup>-1</sup>       | <b>Second order:</b><br>q <sub>e</sub> =78.8 mg g <sup>-1</sup><br>K <sub>2</sub> =0.0057 g mg <sup>-1</sup> min<br>R <sup>2</sup> =0.9968<br><b>Langmuir:</b><br>q <sub>m</sub> =166.1 mg g <sup>-1</sup><br>k <sub>L</sub> =0.1379 L mg <sup>-1</sup><br>R <sup>2</sup> =0.9992<br>maximum adsorption capacity: 65.40 mg g <sup>-1</sup><br><b>Pseudo-second order</b><br>q <sub>e</sub> =48.28 mg g <sup>-1</sup><br>K <sub>2</sub> =0.0131 g mg <sup>-1</sup> min<br>R <sup>2</sup> =0.9826<br><b>Langmuir</b><br>q <sub>m</sub> =65.40 mg g <sup>-1</sup><br>k <sub>L</sub> =0.0453 L mg <sup>-1</sup><br>R <sup>2</sup> =0.9935 | [118] |
| CNTs/ Fe <sub>3</sub> O <sub>4</sub><br>MPTS-CNTs/ Fe <sub>3</sub> O <sub>4</sub>    | Thermal decomposition                                | TEM: 6 nm                                                              | 88.4 m <sup>2</sup> g <sup>-1</sup><br>97.2 m <sup>2</sup> g <sup>-1</sup> | 22.9 emu g <sup>-1</sup><br>29 emu g <sup>-1</sup>                         | Pb(II)                                        | C <sub>0</sub> =50 mg L <sup>-1</sup>                                                                 | 5–90 mg L <sup>-1</sup> | pH=6.5<br>dose=1 g L <sup>-1</sup>          | <b>Pseudo-first order model:</b><br><b>Pb(II)</b><br>k <sub>1</sub> =0.048 min <sup>-1</sup><br>R <sup>2</sup> =0.9874<br>Removal rate: 98% RhB, 92% Pb<br><b>Pseudo-first order model:</b><br><b>Pb(II)</b><br>k <sub>1</sub> =0.027 min <sup>-1</sup><br>R <sup>2</sup> =0.9991<br><b>Adsorption--reaction model:</b>                                                                                                                                                                                                                                                                                                               | [119] |
| Fe <sub>3</sub> O <sub>4</sub> @C@TiO <sub>2</sub> (0FeCTi)                          | Oil - phase cyclic magnetic adsorption (OCMA) method | BET: pore size adsorption=19.34 nm<br>desorption=16.56 nm<br>nanotubes | 37 m <sup>2</sup> g <sup>-1</sup>                                          | -                                                                          | Pb(II)<br>Rhodamine B (RhB)<br>simultaneously | C <sub>0</sub> =100 mL mixed polluted water containing 2 mg Pb(II)<br>2 mg RhB<br>t <sub>c</sub> =3 h | -                       | T=25 °C<br>pH=7<br>dose=1 g L <sup>-1</sup> | <b>Pseudo-first order model:</b><br><b>Pb(II)</b><br>k <sub>1</sub> =0.048 min <sup>-1</sup><br>R <sup>2</sup> =0.9874<br>Removal rate: 98% RhB, 92% Pb<br><b>Pseudo-first order model:</b><br><b>Pb(II)</b><br>k <sub>1</sub> =0.027 min <sup>-1</sup><br>R <sup>2</sup> =0.9991<br><b>Adsorption--reaction model:</b>                                                                                                                                                                                                                                                                                                               | [120] |
| Fe <sub>3</sub> O <sub>4</sub> @C@TiO <sub>2</sub> (1FeCTi)                          | Oil - phase cyclic magnetic adsorption (OCMA) method | BET: pore size adsorption=16.66 nm<br>desorption=13.46 nm<br>nanotubes | 41.7 m <sup>2</sup> g <sup>-1</sup>                                        | 2.1 emu g <sup>-1</sup>                                                    | Pb(II)<br>Rhodamine B (RhB)<br>simultaneously | C <sub>0</sub> =100 mL mixed polluted water containing 2 mg Pb(II)<br>2 mg RhB<br>t <sub>c</sub> =3 h | -                       | T=25 °C<br>pH=7<br>dose=1 g L <sup>-1</sup> | <b>Pseudo-first order model:</b><br><b>Pb(II)</b><br>k <sub>1</sub> =0.027 min <sup>-1</sup><br>R <sup>2</sup> =0.9991<br><b>Adsorption--reaction model:</b>                                                                                                                                                                                                                                                                                                                                                                                                                                                                          |       |



|                                                                  |                                                                  |                                                                                                                                                           |                                     |                                |                                                     |                                                                                                                                                                                    |                                                                        |                                               |                                                                                                                                                                                                                                                                                                                                                                                                                                                                                                                                                                                                                                                                                                                                                                                                                                                                                             |       |
|------------------------------------------------------------------|------------------------------------------------------------------|-----------------------------------------------------------------------------------------------------------------------------------------------------------|-------------------------------------|--------------------------------|-----------------------------------------------------|------------------------------------------------------------------------------------------------------------------------------------------------------------------------------------|------------------------------------------------------------------------|-----------------------------------------------|---------------------------------------------------------------------------------------------------------------------------------------------------------------------------------------------------------------------------------------------------------------------------------------------------------------------------------------------------------------------------------------------------------------------------------------------------------------------------------------------------------------------------------------------------------------------------------------------------------------------------------------------------------------------------------------------------------------------------------------------------------------------------------------------------------------------------------------------------------------------------------------------|-------|
| Fe <sub>3</sub> O <sub>4</sub> @C@TiO <sub>2</sub><br>(3FeCTi)   | Oil - phase<br>cyclic magnetic<br>adsorption<br>(OCMA)<br>method | BET: pore size<br>adsorption=16.08 nm<br>desorption=8.66 nm<br>nanotubes                                                                                  | 50.3 m <sup>2</sup> g <sup>-1</sup> | 3.9 emu<br>g <sup>-1</sup>     | Pb(II)<br>Rhodamin<br>e B (RhB)<br>simultaneo<br>us | C <sub>0</sub> =100 mL mixed<br>polluted water<br>containing<br>2 mg Pb(II)<br>2 mg Rhb<br>t <sub>e</sub> =3 h                                                                     | -                                                                      | T=25 °C<br>pH=7<br>dose=1 g L <sup>-1</sup>   | Pb(II)<br>R <sup>2</sup> =0.9766<br>Pseudo-first order model:<br>Pb(II)<br>k <sub>1</sub> =0.023 min <sup>-1</sup><br>R <sup>2</sup> =0.9590<br>Adsorption-reaction<br>model:<br>Pb(II)<br>R <sup>2</sup> =0.9980<br>sonication time: 20 min<br>For Pb(II)<br>Pseudo-second order:<br>q <sub>e</sub> =114.84 mg g <sup>-1</sup><br>k <sub>2</sub> = 0.0027 min <sup>-1</sup><br>R <sup>2</sup> =0.999                                                                                                                                                                                                                                                                                                                                                                                                                                                                                       | [121] |
|                                                                  |                                                                  |                                                                                                                                                           |                                     |                                |                                                     |                                                                                                                                                                                    |                                                                        |                                               | Experimental:<br>q <sub>e</sub> = 190.75 mg g <sup>-1</sup><br>Langmuir:<br>q <sub>m</sub> =188.84 mg g <sup>-1</sup><br>k <sub>L</sub> =0.0546 L mg <sup>-1</sup><br>R <sup>2</sup> =0.9861<br>Freundlich:<br>k <sub>F</sub> =2.363 L mg <sup>-1</sup><br>n=1.585<br>R <sup>2</sup> =0.9106<br>Pseudo second order:<br>K <sub>2</sub> : 0.430 g mmol <sup>-1</sup> min<br>Langmuir:<br>q <sub>m</sub> :0.442 mmol g <sup>-1</sup><br>k <sub>L</sub> : 22.3 L mmol <sup>-1</sup><br>R <sup>2</sup> =0.999<br>Pseudo-second order:<br>q <sub>e</sub> = 472.84 mg g <sup>-1</sup><br>k <sub>2</sub> = 0.1424 mg min g <sup>-1</sup><br>R <sup>2</sup> =0.9996<br>Freundlich:<br>k <sub>F</sub> = 502.2 mg g <sup>-1</sup><br>n=2.42<br>R <sup>2</sup> = 0.9204<br>Langmuir:<br>q <sub>m</sub> =681.2 mg g <sup>-1</sup><br>k <sub>L</sub> =2.599 L mg <sup>-1</sup><br>R <sup>2</sup> = 0.998 |       |
| Fe <sub>3</sub> O <sub>4</sub> -FeMoS <sub>4</sub> -<br>MgAl-LDH | precipitation                                                    | FE-SEM: 35 nm<br>SEM: layered<br>morphology with often<br>hexagonal crystal<br>shape                                                                      | -                                   | 60 emu<br>g <sup>-1</sup>      | Pb(II)<br>Cd(II)<br>Cu(II)<br>simultaneo<br>us      | C <sub>0</sub> (Pb(II))=20 mg<br>L <sup>-1</sup><br>C <sub>0</sub> (Cd(II))=20 mg<br>L <sup>-1</sup><br>C <sub>0</sub> (Cu(II))=20 mg<br>L <sup>-1</sup><br>t <sub>e</sub> =60 min | 10-300<br>mg L <sup>-1</sup>                                           | T=25 °C<br>pH=5<br>dose=1.5 g L <sup>-1</sup> |                                                                                                                                                                                                                                                                                                                                                                                                                                                                                                                                                                                                                                                                                                                                                                                                                                                                                             |       |
| SH-mSi@ Fe <sub>3</sub> O <sub>4</sub>                           | Modified<br>Stöber method                                        | SEM and TEM: 500 nm                                                                                                                                       | 321                                 | m <sup>2</sup> g <sup>-1</sup> | 38.4<br>emu g <sup>-1</sup>                         | Pb(II)                                                                                                                                                                             | C <sub>0</sub> =0-0.6 mg L <sup>-1</sup><br><br>t <sub>e</sub> =20 min | -                                             | dose= 0.01 g<br>L <sup>-1</sup><br>pH=6.5                                                                                                                                                                                                                                                                                                                                                                                                                                                                                                                                                                                                                                                                                                                                                                                                                                                   |       |
| mHAP-oMWCNTs                                                     | Fe <sub>3</sub> O <sub>4</sub> (Hydroth<br>ermal method)         | SEM: spindly tubular<br>structure with the<br>average tube size of<br>~40 nm<br>mHAP-oMWCNTs<br>had the cylinder<br>structure with opens at<br>both ends. | 212                                 | m <sup>2</sup> g <sup>-1</sup> | 33 emu<br>g <sup>-1</sup>                           | Pb(II)                                                                                                                                                                             | C <sub>0</sub> =100 mg L <sup>-1</sup><br>t <sub>e</sub> =40 min       | 40–200 mg L <sup>-1</sup>                     | T=25 °C<br>pH=4.1<br>dose=0.1 g L <sup>-1</sup>                                                                                                                                                                                                                                                                                                                                                                                                                                                                                                                                                                                                                                                                                                                                                                                                                                             |       |
